# Supplementary material
Source: MDPI journal article supplement (https://www.mdpi.com/2225-1154/12/2/27)
Supplement: s1 [file s1]

## Supplemental Material

**Table S1.** Literature Reported Statistical Downscaling Efforts.

| Reference | Region                      | Variable | Method                   | Predictor Selection                                                                        | Performance indicator       | GCM         |
|-----------|-----------------------------|----------|--------------------------|--------------------------------------------------------------------------------------------|-----------------------------|-------------|
| [94]      | Pakistan                    | T        | MLR                      | Backward stepwise regression                                                               | R2; RMSE                    | CMIP5       |
| [95]      | Chile                       | P; T     | Analogue Method          | correlation                                                                                | R, bias                     | CMIP5       |
| [96]      | Vietnam                     | P; T     | SDSM                     | Partial correlation                                                                        | MAE; MBE                    | CANES<br>M2 |
| [97]      | Iraq                        | P; T     | SDSM                     | Partial correlation                                                                        | R2; RMSE; NSE               | CANES<br>M2 |
| [98]      | Victoria Australia          | P        | GP, ANN, RVM, SVR        | correlation                                                                                | RMSE                        |             |
| [99]      | Limbang Malaysia            | P        | SDSM                     | Partial correlation                                                                        | RMSE, R2                    | CANES<br>M2 |
| [84]      | Tanzania                    | P; T     | SDSM                     | partial correlation                                                                        | R2                          | HadCM3      |
| [4]       | Narmada India               | P        | SDSM                     | partial correlation; correlation                                                           | RMSE; NMSE; N-S             | HadCM3      |
| [100]     | Onkaparinga                 | P        | Generalized linear model | correlation; Kendall's $\tau$ ; partial                                                    | R2; Spearman                | CMIP5       |
| [101]     | Australia                   |          | GLIMCLIM                 | correlation;<br>Two-tailed test                                                            | correlation                 |             |
| [102]     | Florida USA                 | P        | MLR; PCR; SR; SVM        | PCA; FCM                                                                                   | R; MAE; LEPS ; N-S;<br>RMSE | CGCM3       |
| [40]      | Jhelum Pakistan             | T        | SDSM                     | partial correlation; correlation matrix<br>explained variance; histograms;<br>scatterplots | R2<br>RS; RMSE              | HadCM3      |
| [103]     | Tawa India                  | P        | SDSM                     | partial correlation; correlation; scatter<br>plots                                         | R                           | HadCM3      |
| [104]     | Ganges–<br>Brahmaputra      | P        | SDSM                     | partial correlation                                                                        | R2; RMSE; N-S; MB           | CGCM3.<br>1 |
| [85]      | Victoria Australia          | Q        | MLR; LS-SVM              | Pearson Correlation                                                                        | R2; SANS; N-S               |             |
| [88]      | Karkheh Iran                | P; T     | SDSM                     | correlation analysis; partial correlation                                                  | R2; RMSE; N-S; EV           | HadCM3      |
| [88]*     | Karkheh Iran                | P; T     | ANN                      | sensitivity analysis                                                                       | R2; RMSE; N-S; EV           | HadCM<br>3  |
| [80]      | Quebec Canada               | P        | SR; DA+ weather typing   | partial correlation                                                                        | Explained variance          | CRCM        |
| [105]     | Quebec Canada               | P        | MLR                      | backward stepwise regression                                                               | R2                          | CGCM3       |
| [106]     | Tunga–Bhadra River<br>India | P; T     | SDSM                     | partial correlation; correlation; scatter<br>plots                                         | R2; N-S; D                  | HadCM3      |

| Reference | Region               | Variable | Method                             | Predictor Selection                              | Performance indicator   | GCM       |
|-----------|----------------------|----------|------------------------------------|--------------------------------------------------|-------------------------|-----------|
| [87]      | Thailand             | P; T     | MLR; SVM-POL; SVM-RBF              | -                                                | RMSE; R; MAE; RAE; RRSE | GFDL-CM2  |
| [107]     | NW Iberian Peninsula | T        | Analogue Method                    | -                                                | SE                      | MMMICE    |
| [108]     | Tahatli Turkey       | P        | ANN                                | PCA; Singular value decomposition; CC            | R2; Mallow's Cp; RMS    |           |
| [109]     | Punjab India         | P        | SVM; KNN; CRF                      | correlation analysis                             | CDF; Box-plot           | CGCM3     |
| [110]     | Taiwan               | P        | SVM; SVC+SVR; MA DA+SR             | two-sample; KS test; Spearman's rank correlation | Q-Q plot                | HadCM3    |
| [86]      | Upper-Elqui Chile    | P; T     | SDSM                               | partial correlation                              | R2; SE                  | HadCM3    |
| [111]     | Quebec Canada        | P; T     | ASD                                | backward stepwise regression                     | RMSE                    | CGCM1     |
| [112]     | Mahanadi India       | Q        | RVM                                | PCA; FCM                                         | R; N-S                  | CCSR/NIES |
| [28]      | Quebec Canada        | P        | SR; Principal Component Regression | PCA; stepwise regression                         | Q-Q plot; MAE; RMSE     | CGCM1     |
| [38]      | Quebec Canada        | P; T     | SDSM                               | partial correlation                              | t-test; f-test          | CGCM1     |
| [113]     | England              | P        | RBF; ANN; MLP; SDSM                | SR; compositing; GA                              | RMSE; R                 |           |

T=Temperature; P=Precipitation; Q=Stream flow; SDSM=Statistical Downscaling Model; MLR=Multiple linear regression; PCR=Positive coefficient regression; SR= Stepwise regression; SVM= Support vector machine; LS-SVM= Least square support vector machine; ANN=Artificial Neural Network; DA= Discriminant analysis; SVM-POL= Support vector machine with polynomial kernel; SVM-RBF= Support vector machine with Radial Basis Function kernel; KNN= K-nearest neighbor; CRF= Conditional random field; SVC= Support Vector Classification; SVR= Support Vector Regression; MA= Multivariate analysis; GP= Genetic Programming, ASD= Automated statistical downscaling; RVM= Relevance Vector Machine; RBF= Radial Basis Function; MLP= Multi-Layer Perceptron; PCA= Principal Component Analysis; CC = Canonical Correlation; FCM= Fuzzy c-means clustering method; GA= Genetic Algorithm; R2= Coefficient of determination; RMSE=Root-mean squared error; NMSE=Normalized Mean Square Error; N-S=Nash-Sutcliffe efficiency; R=Correlation Coefficient; MAE= Mean Absolute error; LEPS= Linear error in probability space; RS=Ratio of simulated to observed standard deviations; MB=mean bias; SANS= Seasonally adjusted Nash-Sutcliffe efficiency; EV=Error in runoff Volume; D=Deviation; SE= Standard Error; RAE= Relative absolute error; RRSE=Root relative squared error; CDF= Cumulative density function; RRMSE= Relative Root-mean squared error; RMS=Residual Mean Squared; HadCM3= Hadley Centre Coupled Model version 3; CMIP5= Coupled Model Inter-comparison Project Phase 5; CGCM3= Canadian Global Climate Model version 3; CRCM= Coupled Regional Climate Model; GFDL-CM2= Geophysical Fluid Dynamics Laboratory Coupled Model version 3

\*Same paper as the one preceding it but presenting two downscaling methods that yield different results

**Table S2** Literature Reported Predictors in Statistical Downscaling of Climate Change.

| Reference* |                                                        | Predictors (see legend) |    |    |    |    |    |    |    |                                                 |    |    |    |    |    |    |    |    |                          |    |    |    |    |    |    |    |    |    |    |    |    |
|------------|--------------------------------------------------------|-------------------------|----|----|----|----|----|----|----|-------------------------------------------------|----|----|----|----|----|----|----|----|--------------------------|----|----|----|----|----|----|----|----|----|----|----|----|
|            |                                                        | 1                       | 2  | 3  | 4  | 5  | 6  | 7  | 8  | 9                                               | 10 | 11 | 12 | 13 | 14 | 15 | 16 | 17 | 18                       | 19 | 20 | 21 | 22 | 23 | 24 | 25 | 26 | 27 | 28 | 29 | 30 |
| [1]        |                                                        |                         | T  | T  |    |    |    | T  |    | T                                               |    |    |    |    |    |    |    |    |                          | T  |    |    |    |    |    |    |    |    |    | T  | T  |
| [2]        |                                                        |                         | PT | PT |    |    |    |    |    |                                                 |    |    |    |    |    |    |    |    | PT                       |    |    | PT |    |    |    |    |    |    |    |    | PT |
| [3]        |                                                        |                         | PT | PT | PT | PT | PT |    | PT |                                                 |    |    |    |    |    |    |    |    |                          | PT | PT |    |    |    |    |    |    |    |    |    | PT |
| [4]        |                                                        |                         | PT | PT | PT | PT | PT |    | PT |                                                 |    |    |    |    |    |    |    |    |                          | PT | PT |    |    |    |    |    |    |    |    |    | PT |
| [5]        |                                                        |                         |    |    |    |    |    |    | P  |                                                 |    |    |    |    |    |    |    |    | P                        | P  |    |    |    |    |    |    |    |    |    | P  | P  |
| [6]        |                                                        |                         |    |    |    |    | P  |    |    |                                                 |    | P  |    |    |    |    |    |    |                          |    |    |    |    |    |    |    |    |    |    |    |    |
| [7]        |                                                        |                         | PT | PT | PT | PT | PT |    | PT |                                                 |    |    |    |    |    |    |    |    |                          | PT | PT |    |    |    |    |    |    |    |    |    | PT |
| [8]        |                                                        | P                       | P  | P  | P  | P  | P  |    | P  |                                                 |    | P  | P  | P  | P  | P  | P  | P  |                          | P  | P  |    |    | P  | P  | P  | P  | P  | P  |    | P  |
| [9]        |                                                        |                         |    |    |    |    |    |    |    |                                                 |    |    | P  |    |    |    |    |    |                          |    |    | P  |    |    |    |    | P  | P  |    |    |    |
| [10]       |                                                        |                         |    |    |    |    |    |    |    |                                                 |    |    |    |    |    |    |    |    |                          |    |    |    |    |    |    |    |    |    |    |    |    |
| [11]       |                                                        |                         | P  | P  |    |    |    |    |    |                                                 |    |    |    |    |    |    |    |    | P                        |    |    |    |    |    |    |    |    |    |    |    | P  |
| [12]       |                                                        |                         | T  |    | T  |    |    |    |    | T                                               |    |    |    |    |    | T  |    |    |                          |    |    |    |    |    |    |    |    |    |    |    |    |
| [13]       |                                                        | P                       | P  | P  | P  | P  | P  |    |    | P                                               |    |    | P  | P  | P  | P  | P  | P  |                          | P  | P  |    |    | P  | P  | P  | P  | P  | P  |    | P  |
| [14]       |                                                        | P                       |    | P  | P  | P  | P  | P  |    |                                                 |    |    | P  | P  | P  | P  | P  | P  |                          | P  |    |    |    | P  | P  | P  | P  | P  | P  | P  | P  |
| [15]       |                                                        |                         |    |    |    |    |    | Q  | Q  | Q                                               | Q  |    |    |    |    |    |    |    | Q                        | Q  | Q  | Q  |    |    |    |    |    |    |    | Q  | Q  |
| [16]       |                                                        |                         | P  |    | T  |    |    |    |    |                                                 |    |    |    |    |    |    |    |    |                          |    |    |    |    |    |    |    |    |    | P  |    | T  |
| [16]**     |                                                        |                         |    |    |    |    | PT |    |    | PT                                              |    |    |    |    |    |    | PT |    |                          |    | PT |    |    |    |    |    |    |    |    |    | PT |
| [17]       |                                                        | P                       | P  | P  | P  | P  | P  | P  |    |                                                 |    |    | P  | P  | P  | P  | P  | P  | P                        | P  |    |    |    | P  | P  | P  | P  | P  | P  | P  | P  |
| [18]       |                                                        | P                       | P  | P  | P  | P  | P  | P  |    |                                                 |    |    | P  | P  | P  | P  | P  | P  | P                        | P  |    |    |    | P  | P  | P  | P  | P  | P  | P  | P  |
| [19]       |                                                        |                         | PT | PT | PT |    | PT | PT |    | PT                                              |    | PT |    | PT | PT | PT |    | PT | PT                       | PT | PT |    | PT |    | PT | PT | PT |    | PT | PT | PT |
| [20]       |                                                        |                         |    |    |    |    |    |    |    |                                                 |    |    |    |    |    |    |    |    |                          |    |    |    |    |    |    |    |    |    |    |    |    |
| [21]       |                                                        |                         |    |    |    |    |    |    |    |                                                 |    |    |    |    |    |    |    |    |                          |    |    | T  |    |    |    |    |    |    |    |    |    |
| [22]       |                                                        |                         |    |    |    |    |    |    |    |                                                 |    |    |    |    |    |    |    |    |                          | P  | P  | P  |    |    |    |    |    |    |    |    | P  |
| [23]       |                                                        |                         | P  | P  |    |    |    |    |    |                                                 |    |    |    |    |    |    |    |    | P                        |    |    |    |    |    |    |    |    |    |    |    |    |
| [24]       |                                                        |                         | P  | P  | P  | P  | P  | P  |    | P                                               |    | P  |    | P  | P  | P  | P  | P  |                          | P  | P  |    | P  |    | P  | P  | P  | P  | P  |    | P  |
| [25]       |                                                        |                         | T  | T  | T  |    |    |    |    |                                                 |    |    |    | PT |    | T  |    |    |                          | PT | PT |    | P  |    |    |    |    | T  |    | T  | T  |
| [26]       |                                                        |                         | PT | PT | PT | PT | PT | PT |    | PT                                              |    | PT |    | PT | PT | PT | PT | PT | PT                       | PT |    |    | PT |    | PT |
| [27]       |                                                        |                         |    |    |    |    |    |    |    |                                                 |    |    |    |    |    |    |    |    |                          |    |    |    |    |    |    |    |    |    |    |    | Q  |
| [28]       |                                                        |                         | P  | P  | P  | P  | P  | P  | P  |                                                 | P  |    | P  | P  | P  |    | P  | P  | P                        |    |    |    | P  |    | P  | P  | P  |    | P  | P  | P  |
| [28]       |                                                        |                         |    | O  |    |    |    |    |    |                                                 |    |    |    |    |    |    |    |    |                          |    |    |    |    |    |    |    |    |    |    | O  | O  |
| [29]       |                                                        |                         | PT | PT | PT | PT | PT | PT |    | PT                                              |    | PT |    | PT | PT | PT | PT | PT | PT                       | PT |    |    | PT |    | PT |
| [30]       |                                                        |                         | P  | P  | P  |    | P  | P  |    | P                                               |    | P  |    | P  | P  | P  |    | P  | P                        | P  | P  |    | P  |    | P  | P  | P  |    | P  | P  | P  |
| 1          | 1000 hPa Wind Speed                                    |                         |    |    |    |    |    |    | 11 | 1000 hPa airflow strength                       |    |    |    |    |    |    |    | 21 | 850 hPa air temperature  |    |    |    |    |    |    |    |    |    |    |    |    |
| 2          | 1000 hPa Zonal (Eastward) Velocity (U-component)       |                         |    |    |    |    |    |    | 12 | 850hPa Wind Speed                               |    |    |    |    |    |    |    | 22 | 850 hPa airflow strength |    |    |    |    |    |    |    |    |    |    |    |    |
| 3          | 1000 hPa Meridional (Northward) velocity (V-component) |                         |    |    |    |    |    |    | 13 | 850 hPa Zonal (Eastward) Velocity (U-component) |    |    |    |    |    |    |    | 23 | 500 hPa Wind Speed       |    |    |    |    |    |    |    |    |    |    |    |    |

|    |                              |    |                                                       |    |                                                       |
|----|------------------------------|----|-------------------------------------------------------|----|-------------------------------------------------------|
| 4  | 1000 hPa vorticity           | 14 | 850 hPa Meridional (Northward) velocity (V-component) | 24 | 500 hPa Zonal (Eastward) Velocity (U-component)       |
| 5  | 1000 hPa wind direction      | 15 | 850 hPa vorticity                                     | 25 | 500 hPa Meridional (Northward) velocity (V-component) |
| 6  | 1000 hPa divergence          | 16 | 850 hPa wind direction                                | 26 | 500 hPa vorticity                                     |
| 7  | 1000 hPa specific humidity   | 17 | 850 hPa divergence                                    | 27 | 500 hPa wind direction                                |
| 8  | 1000 hPa geopotential height | 18 | 850 hPa specific humidity                             | 28 | 500 hPa divergence                                    |
| 9  | 1000 hPa relative humidity   | 19 | 850 hPa geopotential height                           | 29 | 500 hPa specific humidity                             |
| 10 | 1000 hPa air temperature     | 20 | 850 hPa relative humidity                             | 30 | 500 hPa geopotential height                           |

\*P represents predictors that predict precipitation, T represents predictors for temperature and O represents predictors for occurrence of rainfall

\*\*Same paper as the one precedes it but presenting two downscaling methods which yields different set of predictors

**Table S2** Literature Reported Predictors in Statistical Downscaling of Climate Change (continued).

| Reference* | Predictors (see legend) |    |    |    |    |    |    |    |    |    |    |    |    |    |    |    |    |    |    |    |    |    |    |    |    |    |    |    |    |    |
|------------|-------------------------|----|----|----|----|----|----|----|----|----|----|----|----|----|----|----|----|----|----|----|----|----|----|----|----|----|----|----|----|----|
|            | 31                      | 32 | 33 | 34 | 35 | 36 | 37 | 38 | 39 | 40 | 41 | 42 | 43 | 44 | 45 | 46 | 47 | 48 | 49 | 50 | 51 | 52 | 53 | 54 | 55 | 56 | 57 | 58 | 59 | 60 |
| [1]        | T                       |    |    |    |    |    |    | T  |    |    |    |    |    | T  |    |    |    |    |    |    |    |    |    |    |    |    |    |    |    |    |
| [2]        |                         |    |    |    | PT |    |    |    |    |    | PT |    |    |    |    |    |    |    |    |    |    |    |    |    |    |    |    |    |    |    |
| [3]        | PT                      |    |    |    |    |    |    | PT |    |    |    |    |    | PT | PT | PT | PT |    |    |    |    |    |    |    |    |    |    |    |    |    |
| [4]        | PT                      |    |    |    |    |    |    | PT |    |    |    |    |    | PT | PT | PT | PT |    |    |    |    |    |    |    |    |    |    |    |    |    |
| [5]        | P                       |    |    |    |    |    |    | P  |    |    | P  |    |    | P  |    |    |    |    |    |    |    |    |    |    |    |    |    |    |    |    |
| [6]        |                         |    |    |    |    |    |    |    |    |    |    |    |    |    |    | P  |    |    |    |    |    |    |    |    |    |    |    |    |    |    |
| [7]        | PT                      |    |    |    |    |    |    | PT |    |    |    |    |    | PT | PT | PT | PT |    |    |    |    |    |    |    |    |    |    |    |    |    |
| [8]        | P                       |    |    |    |    |    |    | P  |    | P  |    |    |    | P  |    |    |    |    |    |    |    |    |    |    |    |    |    |    |    |    |
| [9]        | P                       |    |    |    |    | P  | P  |    |    |    |    |    |    |    |    |    |    |    |    |    |    |    |    |    |    | P  | P  | P  | P  | P  |
| [10]       |                         |    |    |    |    |    |    |    |    |    |    |    |    |    |    |    |    |    |    |    |    |    |    |    |    |    |    |    |    |    |
| [11]       |                         |    |    |    |    |    |    |    |    |    | P  |    |    | P  |    |    |    |    |    |    |    |    |    |    |    |    |    |    |    |    |
| [12]       | T                       |    |    |    |    |    |    | T  |    |    |    |    |    |    |    |    |    |    |    |    |    |    |    |    |    |    |    |    |    |    |
| [13]       | P                       |    |    |    |    |    |    | P  |    | P  |    |    |    | P  |    |    |    |    |    |    |    |    |    |    |    |    |    |    |    |    |
| [14]       |                         |    |    |    |    |    |    | P  |    |    |    |    |    | P  | P  |    |    |    |    |    |    |    |    |    |    |    |    |    |    |    |
| [15]       | Q                       | Q  |    | Q  |    | Q  | Q  | Q  |    | Q  | Q  | Q  | Q  | Q  |    |    |    |    |    |    | Q  | Q  |    |    |    |    |    |    |    |    |
| [16]       |                         |    |    |    |    |    |    |    |    |    |    |    |    | PT |    |    |    |    |    |    |    |    |    |    |    |    |    |    |    |    |
| [16]**     | PT                      |    | PT |    |    |    |    |    |    |    | PT |    |    |    |    |    |    |    |    |    |    |    |    |    |    |    |    |    |    |    |
| [17]       |                         |    |    |    |    |    |    | P  |    |    |    |    |    | P  |    |    |    |    |    |    |    |    |    |    |    |    |    |    |    |    |
| [18]       |                         |    |    |    |    |    |    | P  |    |    |    |    |    | P  |    |    |    |    |    |    |    |    |    |    |    |    |    |    |    |    |
| [19]       | PT                      |    | PT |    |    |    |    | PT | PT |    |    |    |    | PT |    |    |    |    |    |    |    |    |    |    |    |    |    |    |    |    |
| [20]       |                         |    |    |    |    |    |    | PT |    |    |    |    | PT |    | PT |    |    |    |    |    |    |    | PT | PT |    |    |    |    |    |    |
| [21]       |                         |    |    |    |    |    |    |    |    |    |    |    |    | T  |    |    |    |    |    |    |    |    |    |    |    |    |    |    |    |    |
| [22]       | P                       | P  |    | P  | P  |    |    |    |    |    |    |    | P  | P  | P  |    |    |    |    |    |    |    |    |    |    |    |    |    |    |    |
| [23]       |                         |    |    |    |    |    |    | P  |    | P  |    |    |    | P  |    |    |    |    |    |    |    |    |    |    |    |    |    |    |    |    |
| [24]       | P                       |    | P  |    |    |    |    | P  |    |    |    |    |    | P  |    |    |    |    |    |    |    |    |    |    |    |    |    |    |    |    |
| [25]       | PT                      |    |    |    |    |    |    | T  |    |    |    |    |    | T  |    |    |    |    |    |    |    |    |    |    |    |    |    |    |    |    |
| [26]       |                         |    | PT |    |    |    |    | PT |    |    |    |    |    | PT |    |    |    |    |    |    |    |    |    |    |    |    |    |    |    |    |
| [27]       |                         |    |    |    |    |    |    | Q  |    | Q  |    |    |    | Q  |    |    |    |    |    |    |    |    |    |    |    |    |    |    |    |    |
| [28]       |                         |    | P  |    |    |    |    |    |    |    | P  |    |    | P  |    |    |    |    |    |    |    |    |    |    |    |    |    |    |    |    |
| [28]       |                         |    |    |    |    |    |    |    |    |    |    |    |    |    |    |    |    |    |    |    |    |    |    |    |    |    |    |    |    | O  |
| [29]       |                         |    | PT |    |    |    |    | PT |    |    |    |    |    | PT |    |    |    |    |    |    |    |    |    |    |    |    |    |    |    |    |
| [30]       | P                       |    | P  |    |    |    |    |    | P  |    |    |    |    | P  |    |    |    |    |    |    |    |    |    |    |    |    |    |    |    |    |

|    |                                  |    |                          |    |                                                       |
|----|----------------------------------|----|--------------------------|----|-------------------------------------------------------|
| h  | 500 hPa relative humidity        | 41 | Surface air temperature  | 51 | Volumetric soil moisture content 0–10 cm              |
| 32 | 500 hPa air temperature          | 42 | Surface skin temperature | 52 | Volumetric soil moisture content 10–200 cm            |
| 33 | 500 hPa airflow strength         | 43 | Surface pressure         | 53 | evaporator                                            |
| 34 | 200 hPa geopotential height      | 44 | Mean sea-level pressure  | 54 | net short wave                                        |
| 35 | 200 hPa air temperature          | 45 | precipitation            | 55 | 700 hPa vorticity                                     |
| 36 | 700 hPa geopotential height      | 46 | Maximum Temperature      | 56 | 700 hPa air temperature                               |
| 37 | 700 hPa relative humidity        | 47 | Minimum Temperature      | 57 | 700 hPa Zonal (Eastward) Velocity (U-component)       |
| 38 | 2 m air temperature              | 48 | Preceding days rainfall  | 58 | 700 hPa Meridional (Northward) velocity (V-component) |
| 39 | 2 m air temperature lagged 1 day | 49 | altitude                 | 59 | Temporal dependence                                   |
| 40 | 2 m specific humidity            | 50 | distance from coast      | 60 | Spatial variation                                     |

\*P represents predictors that predict precipitation, T represents predictors for temperature and O represents predictors for occurrence of rainfall

\*\*Same paper as the one precedes it but presenting two downscaling methods which yields different set of predictors

**Table-S3** Rainfall Occurrence Equations for All Stations.

| Station                | Equation                                                                 |
|------------------------|--------------------------------------------------------------------------|
| AMMAN HUSSEIN COLLEGE  | $RO = 0.72 - 4.67HGT.500 + 1.28HGT.850$                                  |
| BAL'AMA                | $RO = -1.34 + 2.18SHUM.500 - 3.50HGT.500 + 1.67HGT.850$                  |
| BAQURA MET.STATION     | $RO = 0.49 - 5.33HGT.500 + 2.50HGT.850$                                  |
| DEIR ALLA AGR. STATION | $RO = 0.40 - 5.37HGT.500 + 2.64HGT.850$                                  |
| EN NUEIYIME            | $RO = 0.51 - 6.00HGT.500 + 2.21HGT.850$                                  |
| HAR KENAN, IS          | $RO = 2.14 - 4.97HGT.500 + 2.08HGT.850$                                  |
| HOSHA                  | $RO = -0.77 - 5.07HGT.500 + 1.90HGT.850$                                 |
| HUSN                   | $RO = 0.42 - 5.42HGT.500 + 1.78HGT.850$                                  |
| IRBID SCHOOL           | $RO = 0.01 - 6.89HGT.500 + 3.05HGT.850$                                  |
| JABER MUGHAYYIR        | $RO = -0.75 - 3.95HGT.500 + 1.76HGT.850$                                 |
| JARASH                 | $RO = 1.19 - 7.35HGT.500 + 5.23HGT.850$                                  |
| JERUSALEM CENTRAL, IS  | $RO = 2.74 - 4.22T2 + 3.28P + 0.41RHUM.1000$                             |
| JUBEIHA                | $RO = -0.02 - 2.75HGT.500 + 1.76HGT.850$                                 |
| K.H.NURSERY            | $RO = 0.13 - 4.52HGT.500 + 2.33HGT.850$                                  |
| EVAP.ST(BAQ'A)         |                                                                          |
| KHANASIRA              | $RO = -0.11 - 4.87HGT.500 + 1.89HGT.850$                                 |
| KHARJA                 | $RO = 0.45 - 5.30HGT.500 + 1.40HGT.850$                                  |
| KITTA                  | $RO = 1.01 - 6.85HGT.500 + 4.14HGT.850$                                  |
| KUFR SAUM              | $RO = 0.57 - 5.58HGT.500 + 1.86HGT.850$                                  |
| MAFRAQ AIR PORT        | $RO = 0.04 - 1.92UWND.500 - 5.15HGT.500 + 1.13HGT.850$                   |
| MIDWAR                 | $RO = 0.40 - 5.10HGT.500 + 1.13HGT.850$                                  |
| NAWASIF                | $RO = -1.58 + 2.02VWND.500 + 3.01SHUM.500 - 4.60HGT.500 + 2.56HGT.850$   |
| PRINCE FEISAL NURSERY  | $RO = 0.25 - 5.11HGT.500 + 2.56HGT.850$                                  |
| QAFQAF                 | $RO = 0.08 + 10.15SHUM.500 - 11.70RHUM.500 - 14.31HGT.500 + 6.90HGT.850$ |
| RAMTHA BOYS SCHOOL     | $RO = 0.61 - 5.79HGT.500 + 2.84HGT.850$                                  |
| RUMEIMIN               | $RO = 0.25 - 5.55HGT.500 + 2.74HGT.850$                                  |
| RUSEIFA                | $RO = -0.66 - 9.21HGT.500 + 2.30HGT.850$                                 |
| SIHAN                  | $RO = -0.17 - 3.97HGT.500 + 1.41HGT.850$                                 |
| SUBEIHI                | $RO = 0.40 + 2.17RHUM.1000 - 5.69HGT.500 + 2.41HGT.850$                  |
| SUKHNA                 | $RO = 0.25 - 4.73HGT.500$                                                |
| TURRA                  | $RO = -0.36 - 2.92HGT.500 + 1.96HGT.850$                                 |
| UM EL-JUMAL EVAP .ST   | $RO = -0.93 + 2.40VWND.1000 + 2.67SHUM.500 - 3.05HGT.500 + 2.27HGT.850$  |
| UM JAUZA               | $RO = 0.50 - 4.93HGT.500 + 2.58HGT.850$                                  |
| UM QEIS                | $RO = 0.51 - 6.96HGT.500 + 3.14HGT.850$                                  |
| WADI DHULEIL NURSERY   | $RO = -0.18 - 4.30HGT.500 + 1.41HGT.850$                                 |

RO: Rain Occurrence; T2: Temperature at 2m; P: Pressure

RHUM.500: Relative Humidity at 500 pressure level; RHUM.1000: Relative Humidity at 1000 pressure level;

SHUM.500: Specific Humidity at 500 pressure level

UWND.500: U wind component (East/West) at 500 pressure level; VWND.500: V wind component (North/South) at 500 pressure level;

VWND.1000: V wind component (North/South) at 1000 pressure level;

HGT.500: Geopotential Height at 500 mb pressure level; HGT.850: Geopotential Height at 850 mb pressure level

**Table S4** Rainfall Equations for All Stations.

| Station                | Equation                                                                                    |
|------------------------|---------------------------------------------------------------------------------------------|
| AMMAN HUSSEIN COLLEGE  | $\log(R) = 2.46 - 1.48T_2 + 0.67SHUM.500 + 1.13RHUM.1000$                                   |
| BAL'AMA                | $\log(R) = 2.26 - 0.87T_2 + 0.51VWND.1000 + 0.88RHUM.1000$                                  |
| BAQURA MET.STATION     | $\log(R) = 2.45 - 0.52VWND.500 + 0.92 VWND.1000 - 1.12HGT.500 + 0.30 HGT.850$               |
| DEIR ALLA AGR. STATION | $\log(R) = 2.50 - 1.05T_2 + 0.98SHUM.500 + 1.27RHUM.1000$                                   |
| EN NUEIYIME            | $\log(R) = 2.21 - 0.60VWND.500 + 0.91VWND.1000 - 0.94 HGT.500$                              |
| HAR KENAN, IS          | $\log(R) = 2.89 + 1.27VWND.1000 - 1.23HGT.500 + 0.52HGT.850$                                |
| HOSHA                  | $\log(R) = 2.08 - 0.73VWND.500 + 0.62 VWND.1000 + 0.77SHUM.1000 - 0.44HGT.500$              |
| HUSN                   | $\log(R) = 2.77 + 0.84RHUM.1000 - 1.17HGT.500$                                              |
| IRBID SCHOOL           | $\log(R) = 2.55 + 0.46VWND.1000 + 0.44RHUM.1000 - 1.32HGT.500 + 0.37HGT.850$                |
| JABER MUGHAYYIR        | $\log(R) = 2.23 - 0.71VWND.500 + 1.02VWND.1000 + 0.99RHUM.1000$                             |
| JARASH                 | $\log(R) = 2.30 + 0.69VWND.1000 - 1.41HGT.500$                                              |
| JERUSALEM CENTRAL, IS  | $\log(R) = 2.75 - 1.22T_2 + 0.67VWND.1000$                                                  |
| JUBEIHA                | $\log(R) = 2.94 - 1.22T_2 + 0.99RHUM.1000$                                                  |
| K.H.NURSERY            | $\log(R) = 2.47 - 1.45HGT.500$                                                              |
| EVAP.ST(BAQ'A)         |                                                                                             |
| KHANASIRA              | $\log(R) = 1.90 - 0.73VWND.500 + 0.91VWND.1000 - 0.82HGT.500$                               |
| KHARJA                 | $\log(R) = 2.50 + 0.47VWND.1000 + 0.46RHUM.1000 - 1.47HGT.500 + 0.37HGT.850$                |
| KITTA                  | $\log(R) = 2.91 + 0.57VWND.1000 + 0.93RHUM.1000 - 1.26HGT.500$                              |
| KUFR SAUM              | $\log(R) = 2.77 - 0.49VWND.500 + 0.79VWND.1000 - 1.12HGT.500 + 0.29HGT.850$                 |
| MAFRAQ AIR PORT        | $\log(R) = 1.50 + 0.42VWND.1000 + 0.80RHUM.500 - 1.20HGT.500 + 0.74HGT.850$                 |
| MIDWAR                 | $\log(R) = 1.95 + 1.08VWND.1000 - 1.51HGT.500 + 0.77HGT.850$                                |
| NAWASIF                | $\log(R) = 1.86 - 0.60VWND.500 + 0.71VWND.1000 + 0.84RHUM.1000 - 0.83HGT.500 - 0.53HGT.850$ |
| PRINCE FEISAL NURSERY  | $\log(R) = 2.48 + 0.85RHUM.1000 - 1.33HGT.500$                                              |
| QAFQAFA                | $\log(R) = 2.20 + 0.62VWND.1000 + 0.74SHUM.500 + 1.03RHUM.1000 - 1.62HGT.500 + 0.68HGT.850$ |
| RAMTHA BOYS SCHOOL     | $\log(R) = 2.22 + 0.53VWND.1000 - 1.17HGT.500 + 0.30HGT.850$                                |
| RUMEIMIN               | $\log(R) = 2.24 + 0.55VWND.1000 + 0.82RHUM.1000 - 1.62HGT.500 + 0.60HGT.850$                |
| RUSEIFA                | $\log(R) = 2.13 - 1.35T_2 - 0.53P$                                                          |
| SIHAN                  | $\log(R) = 2.77 + 0.77RHUM.1000 - 1.45HGT.500 + 0.46HGT.850$                                |
| SUBEIHI                | $\log(R) = 2.43 + 0.82SHUM.500 - 1.98HGT.500 + 0.65HGT.850$                                 |
| SUKHNA                 | $\log(R) = 1.52 + 0.97VWND.1000 - 1.08HGT.500 + 0.54HGT.850$                                |
| TURRA                  | $\log(R) = 2.48 - 0.50VWND.500 + 0.68VWND.1000 + 0.57RHUM.1000 - 0.82HGT.500$               |
| UM EL-JUMAL EVAP .ST   | $\log(R) = 2.23 + 1.06RHUM.1000 - 0.73HGT.500$                                              |
| UM JAUZA               | $\log(R) = 2.62 + 0.70VWND.1000 - 1.26HGT.500$                                              |
| UM QEIS                | $\log(R) = 2.89 - 0.43VWND.500 + 0.70VWND.1000 + 0.82RHUM.1000 - 0.79HGT.500$               |
| WADI DHULEIL NURSERY   | $\log(R) = 2.00 + 0.88RHUM.1000 - 0.86HGT.500 + 0.43HGT.850$                                |

R: Rain Amount; T<sub>2</sub>: Temperature at 2m; P: Pressure

VWND.500: V wind component (North/South) at 500 pressure level; VWND.1000: V wind component (North/South) at 1000 pressure level

RHUM.500: Relative Humidity at 500 pressure level; RHUM.1000: Relative Humidity at 1000 pressure level

SHUM.500: Specific Humidity at 500 pressure level

HGT.500: Geopotential Height at 500 mb pressure level; HGT.850: Geopotential Height at 850 mb pressure level

**Table S5** Temperature Equations for All Stations.

| Station        | Season    | Equation                                                    |
|----------------|-----------|-------------------------------------------------------------|
| Beirut Airport | Winter    | $T = 19.39 + 1.66T_2 - 0.93P$                               |
|                | Spring    | $T = 19.38 + 4.66T_2$                                       |
|                | Summer    | $T = 21.53 + 1.68T_2 - 1.36P + 1.72HGT.500$                 |
|                | Fall      | $T = 21.54 + 4.86T_2$                                       |
|                | One Model | $T = 20.58 + 5.20T_2$                                       |
| Damascus       | Winter    | $T = 13.16 + 2.16T_2 - 1.41P + 0.56UWND.1000 + 1.80HGT.500$ |
|                | Spring    | $T = 17.27 + 7.41T_2 + 1.11UWND.1000$                       |
|                | Summer    | $T = 18.60 + 3.36T_2 - 1.89P + 2.02HGT.500$                 |
|                | Fall      | $T = 15.67 + 7.47T_2$                                       |
|                | One Model | $T = 16.87 + 7.65T_2$                                       |
| H4 Airbase     | Winter    | $T = 17.09 + 3.71T_2 - 1.35P + 2.05HGT.500$                 |
|                | Spring    | $T = 19.68 + 8.07T_2$                                       |
|                | Summer    | $T = 20.38 + 5.10T_2 - 1.09P + 1.78HGT.500$                 |
|                | Fall      | $T = 19.78 + 8.07T_2$                                       |
|                | One Model | $T = 19.62 + 8.25T_2$                                       |
| MA AN          | Winter    | $T = 16.28 + 3.16T_2 - 1.45P + 2.22HGT.500$                 |
|                | Spring    | $T = 17.25 + 7.57T_2$                                       |
|                | Summer    | $T = 16.41 + 7.51T_2 + 0.73UWND.1000 + 1.25HGT.500$         |
|                | Fall      | $T = 18.00 + 7.35T_2$                                       |
|                | One Model | $T = 17.80 + 7.39T_2$                                       |
| Prince Hassan  | Winter    | $T = 16.64 + 4.86T_2 + 1.32HGT.500$                         |
|                | Spring    | $T = 19.12 + 8.02T_2$                                       |
|                | Summer    | $T = 19.21 + 8.54T_2$                                       |
|                | Fall      | $T = 20.15 + 7.98T_2$                                       |
|                | One Model | $T = 19.56 + 8.14T_2$                                       |
| Ghor Safi      | Winter    | $T = 21.67 + 3.94T_2 + 0.20UWND.1000 + 0.35RHUM.1000$       |
|                | Spring    | $T = 25.59 + 5.83T_2 + 0.90UWND.1000$                       |
|                | Summer    | $T = 28.02 + 4.23T_2 - 0.82P + 0.58UWND.1000$               |
|                | Fall      | $T = 25.51 + 6.38T_2 + 0.79RHUM.1000$                       |
|                | One Model | $T = 25.80 + 6.60T_2$                                       |
| King Hussein   | Winter    | $T = 15.51 + 3.75T_2 - 0.79P + 0.32UWND.1000 + 1.58HGT.500$ |
|                | Spring    | $T = 17.32 + 7.02T_2$                                       |
|                | Summer    | $T = 18.00 + 6.60T_2$                                       |
|                | Fall      | $T = 17.15 + 6.76T_2$                                       |
|                | One Model | $T = 17.29 + 6.70T_2$                                       |
| Jerusalem      | Winter    | $T = 20.67 + 2.55T_2 - 1.40P - 0.89RHUM.1000 + 3.54HGT.500$ |
|                | Spring    | $T = 21.40 + 8.31T_2$                                       |
|                | Summer    | $T = 20.36 + 7.98T_2$                                       |
|                | Fall      | $T = 21.63 + 6.98T_2$                                       |
|                | One Model | $T = 21.37 + 7.26T_2$                                       |
| Har Kenaan     | Winter    | $T = 16.86 + 1.04T_2 - 1.50P - 0.78RHUM.1000 + 3.62HGT.500$ |
|                | Spring    | $T = 21.07 + 8.78T_2$                                       |
|                | Summer    | $T = 23.00 + 2.00T_2 - 1.58P - 1.77RHUM.1000 + 3.21HGT.500$ |
|                | Fall      | $T = 20.46 + 7.86T_2$                                       |
|                | One Model | $T = 20.62 + 8.08T_2$                                       |

$T_2$ : Temperature at 2m; P: Pressure;

UWND.1000: U wind component (East/West) at 1000 pressure level;

RHUM.1000: Relative Humidity at 1000 pressure level;

HGT.500: Geopotential Height at 500 mb pressure level

**Table S6:** Temperature and Precipitation at Each Station.

Past observed data, historical corrected GCM,

NCEP and future forecast for RCP 4.5 and RCP 8.5, and

raw GCM averaged between RCP 4.5 and RCP 8.5

GCM\_fut is the average, over both RCP scenarios, of the uncorrected GCM projections

## Temperature

Beirut Airport

Winter

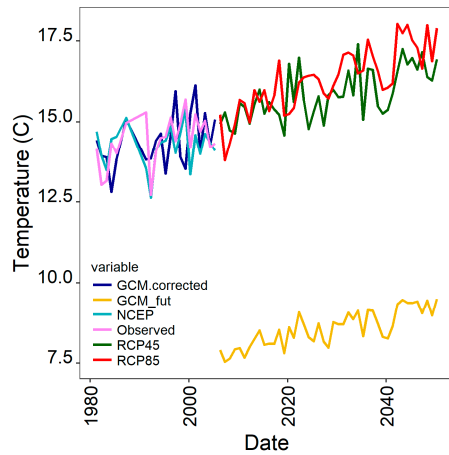

Spring

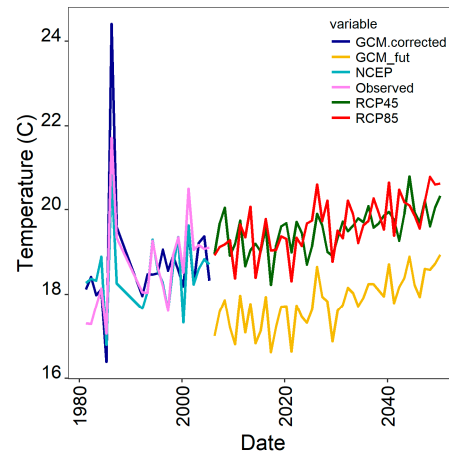

Summer

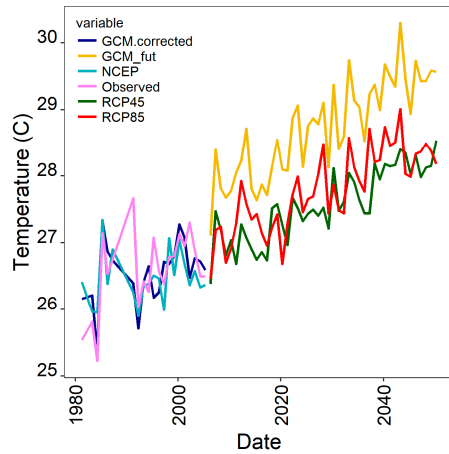

Fall

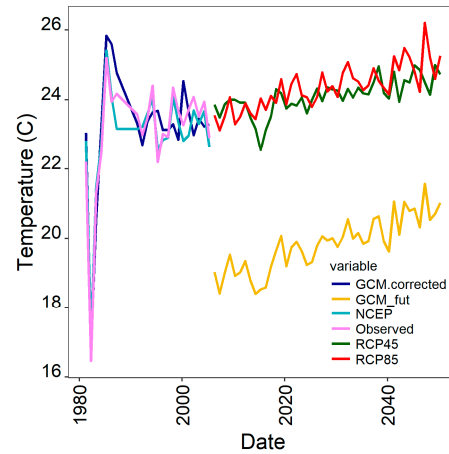

One Model

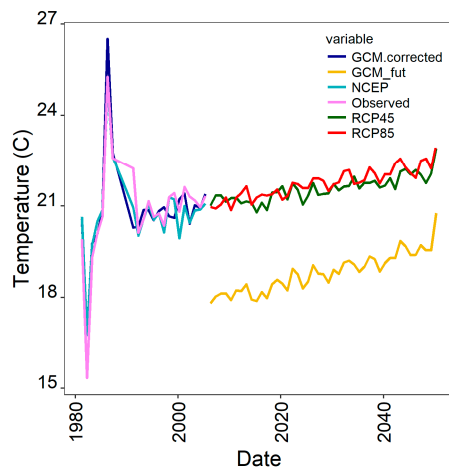

*Damascus*  
*Winter*

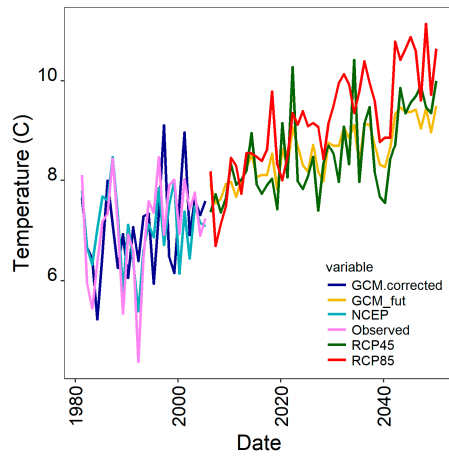

*Spring*

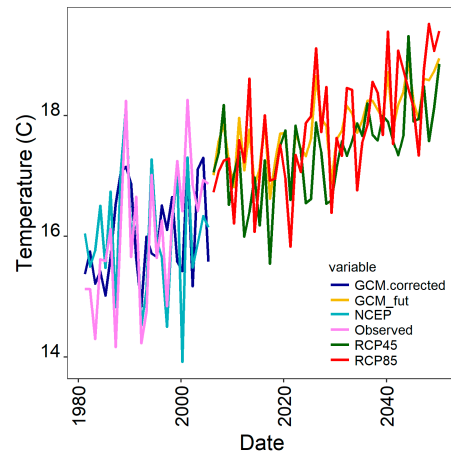

*Summer*

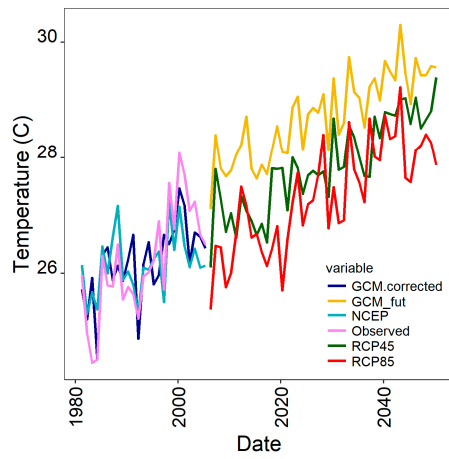

*Fall*

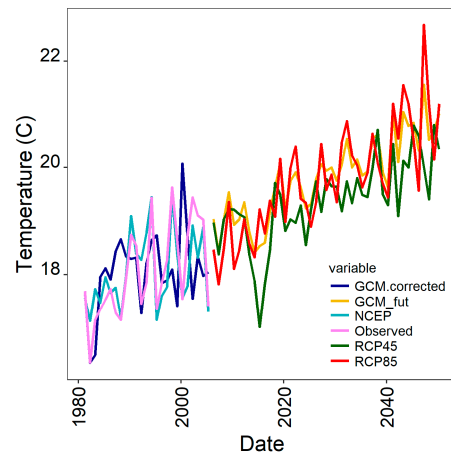

*One Model*

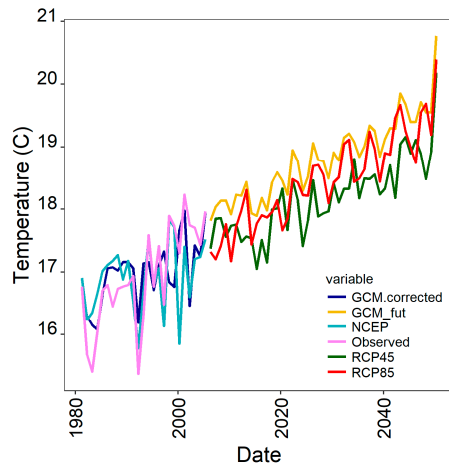

*H4 Airbase*  
*Winter*

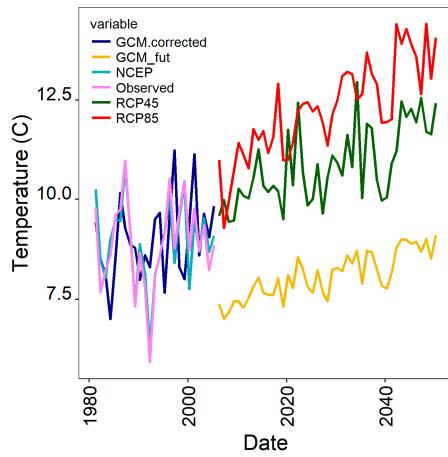

*Spring*

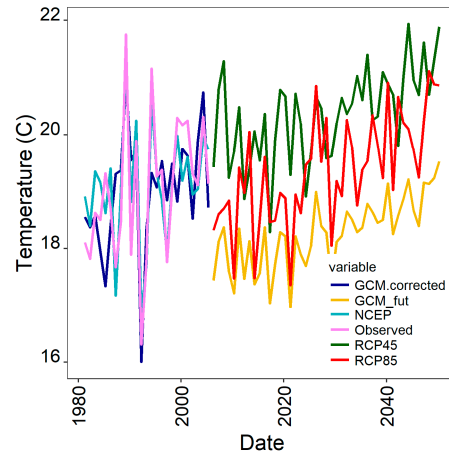

*Summer*

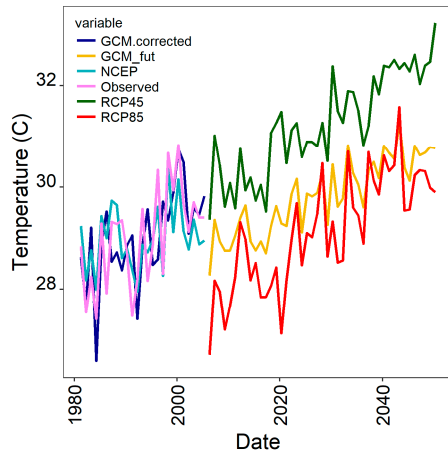

*Fall*

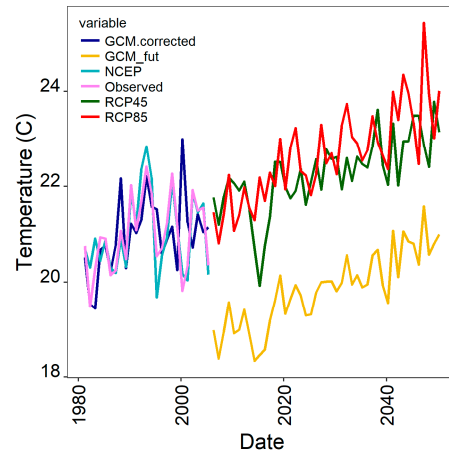

*One Model*

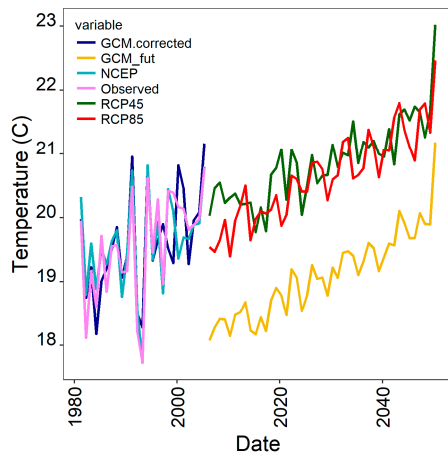

Ma'an  
Winter

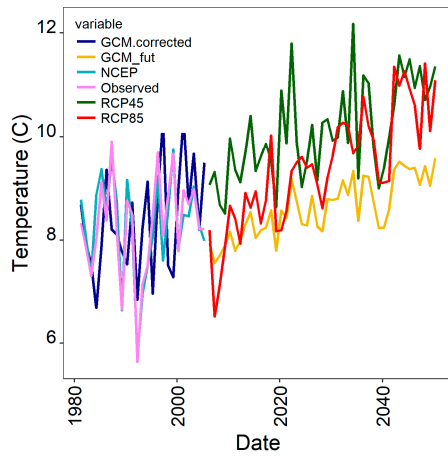

Spring

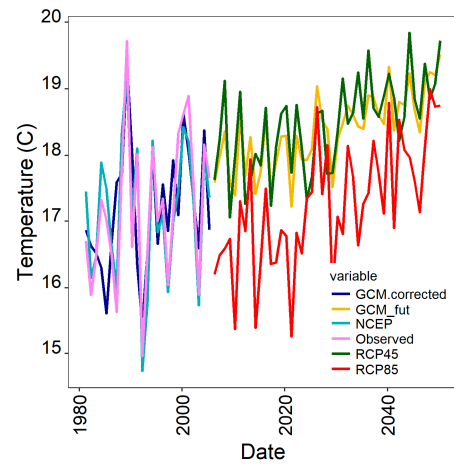

Summer

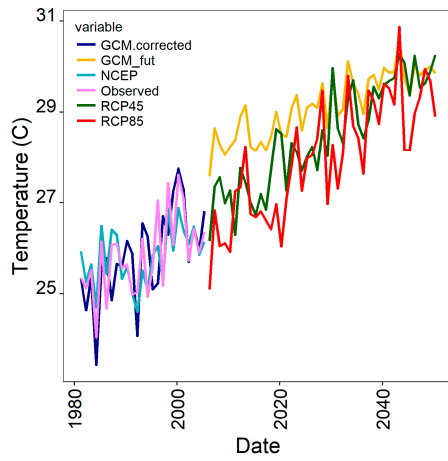

Fall

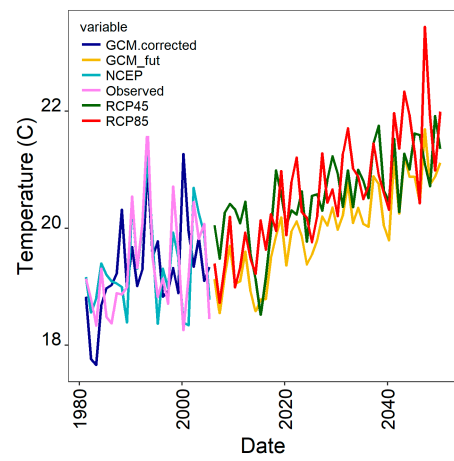

One Model

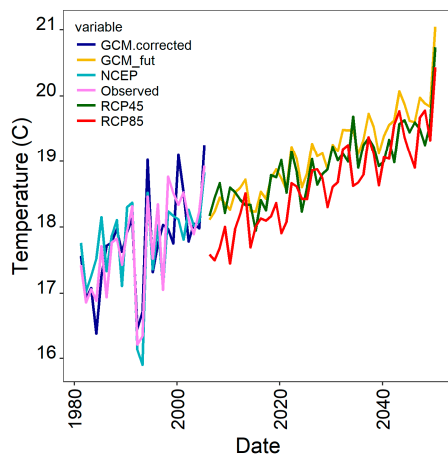

Winter

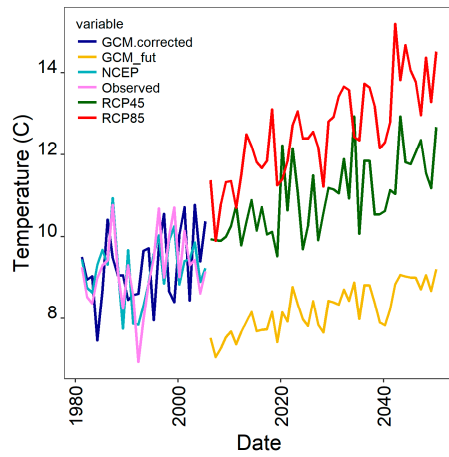

Spring

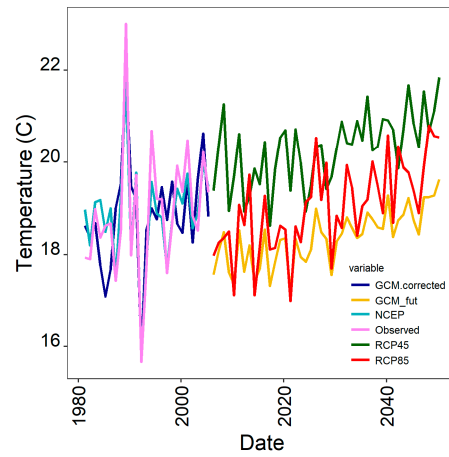

Summer

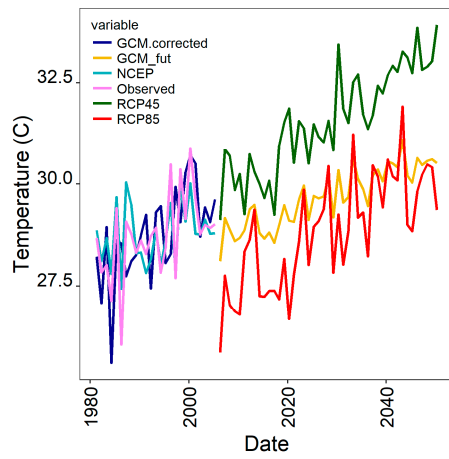

Fall

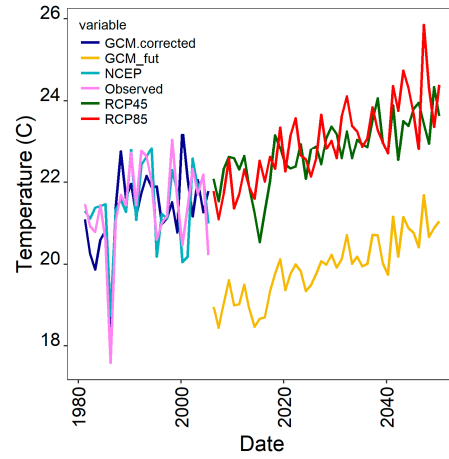

One Model

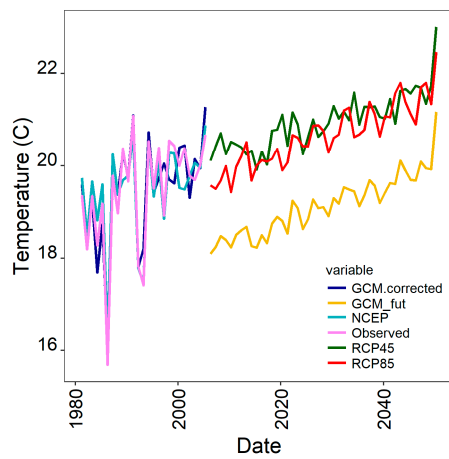

Ghor Safi

Winter

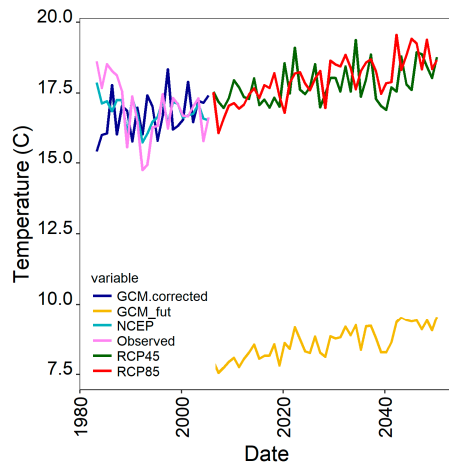

Spring

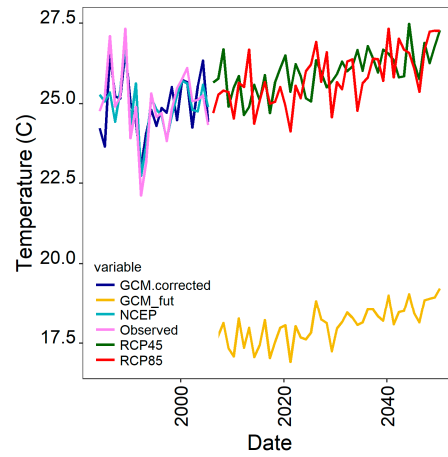

Summer

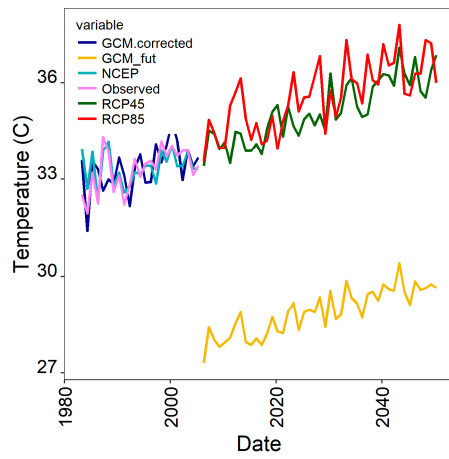

Fall

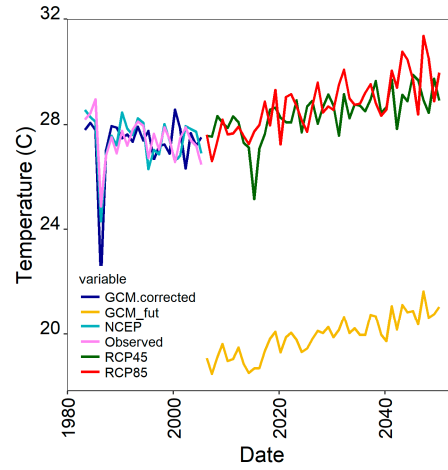

One Model

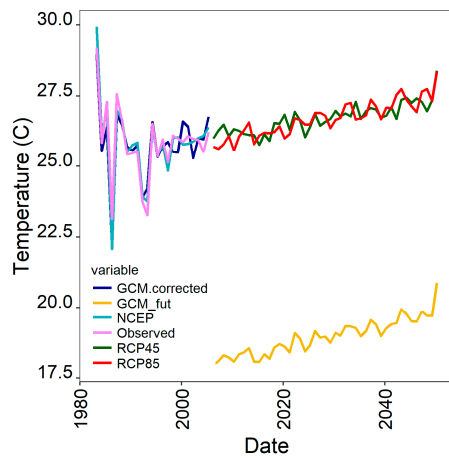

King Hussein

Winter

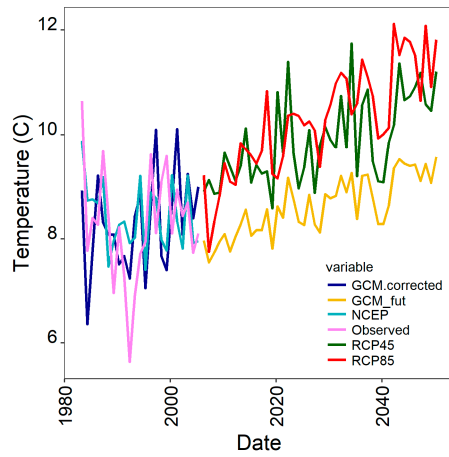

Spring

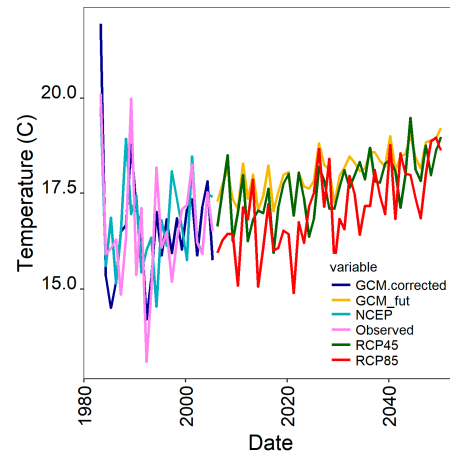

Summer

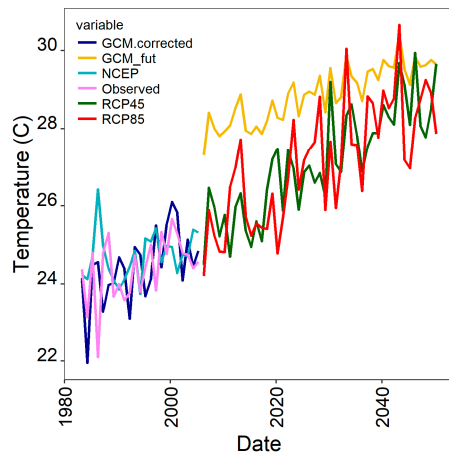

Fall

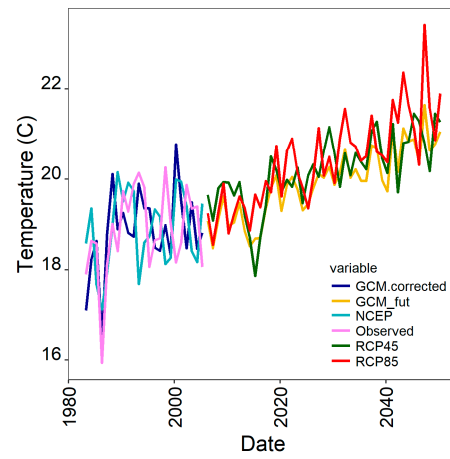

One Model

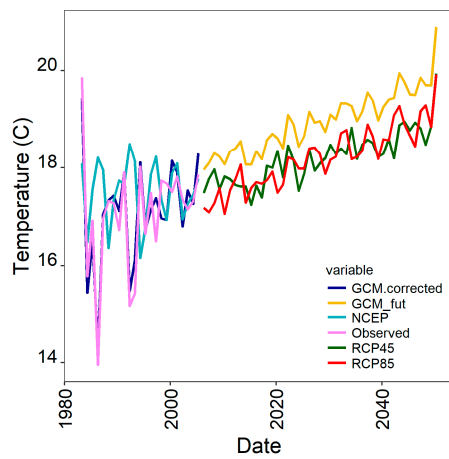

Jerusalem  
Winter

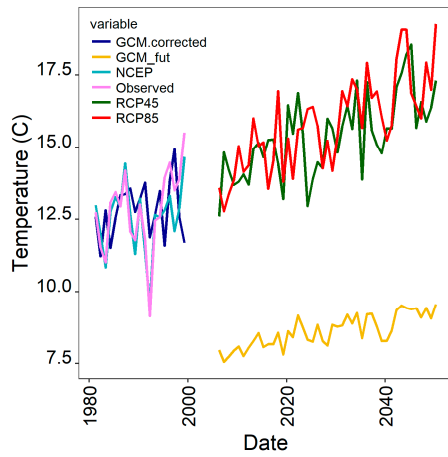

Spring

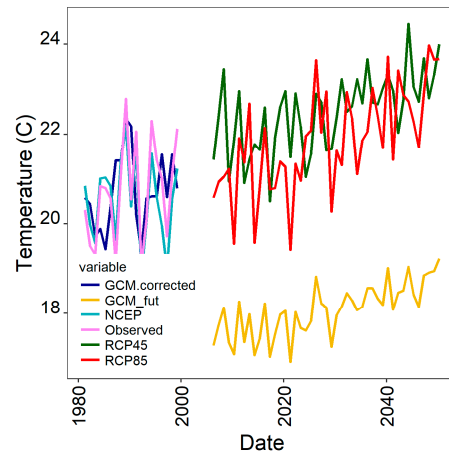

Summer

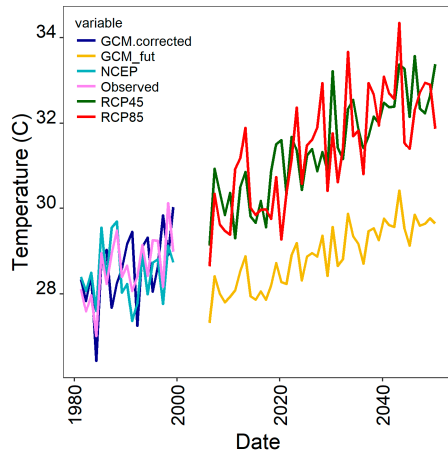

Fall

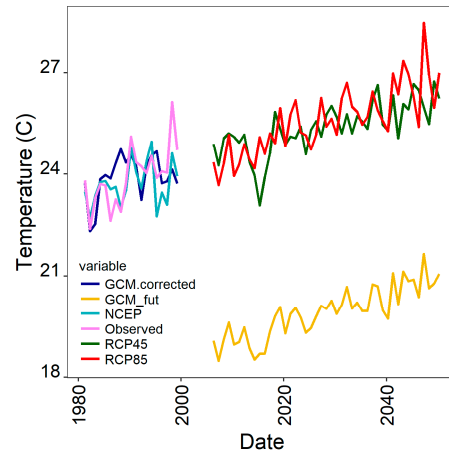

One Model

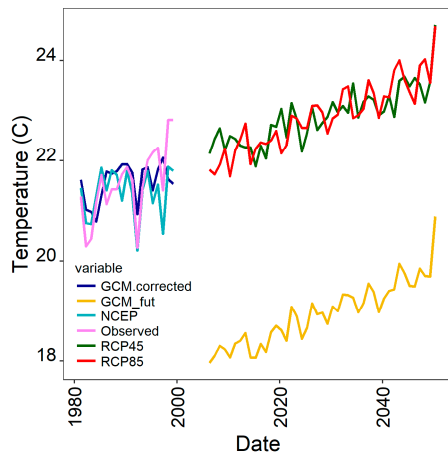

Har Kenaan

Winter

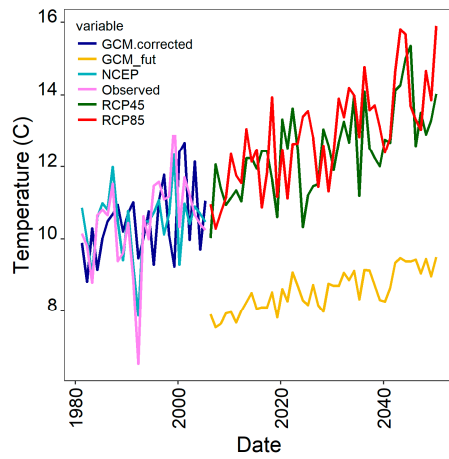

Spring

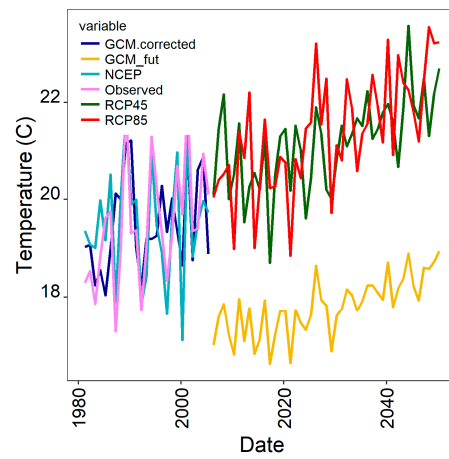

Summer

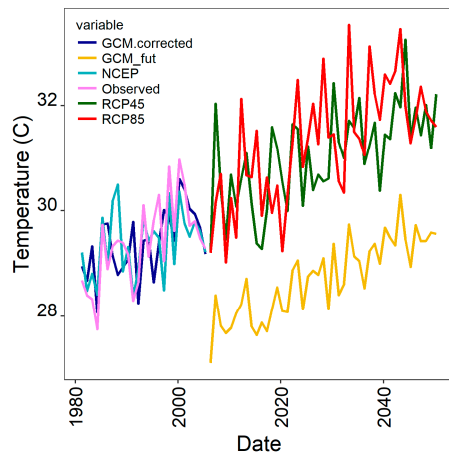

Fall

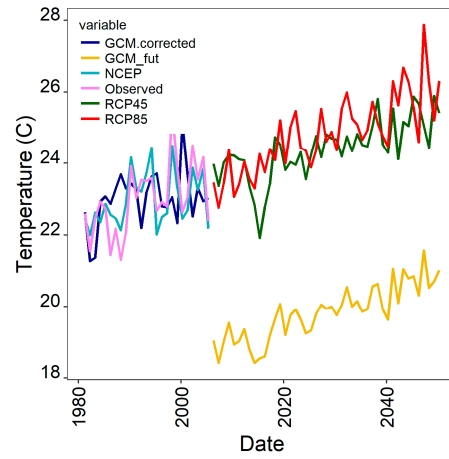

One Model

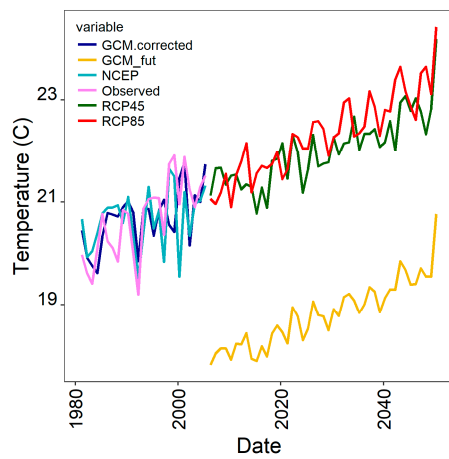

## Precipitation

AMMAN HUSSEIN COLLEGE

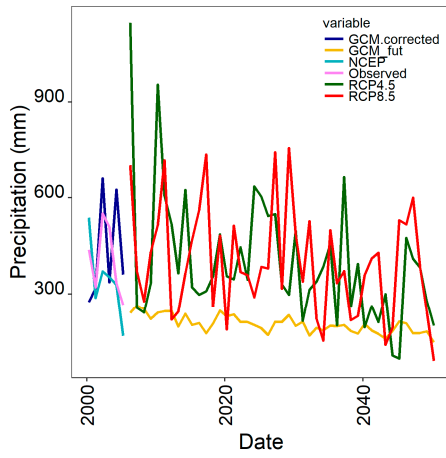

BAL'AMA

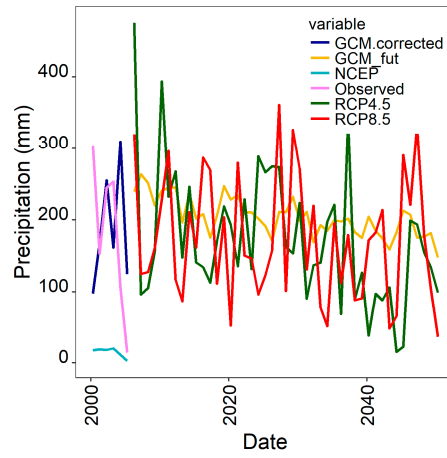

BAQURA MET.STATION

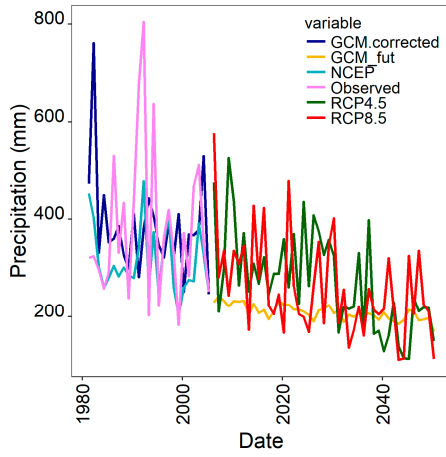

DEIR ALLA AGR. STATION

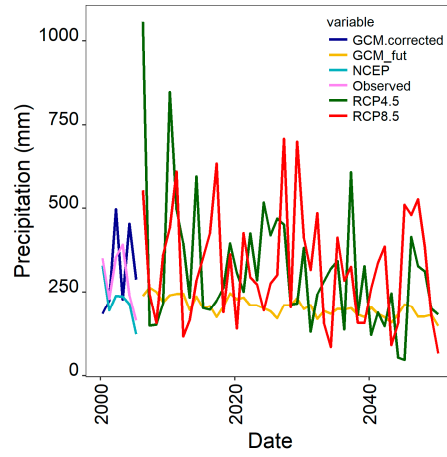

EN NUEIYME

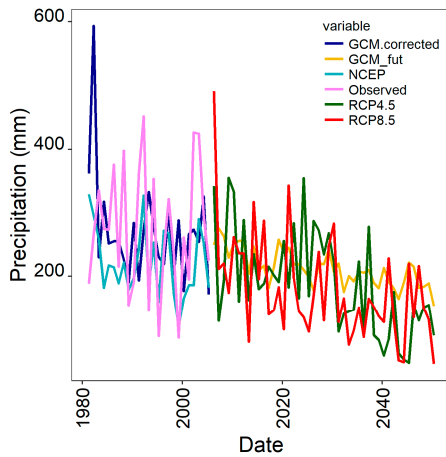

HAR KENAAN, IS

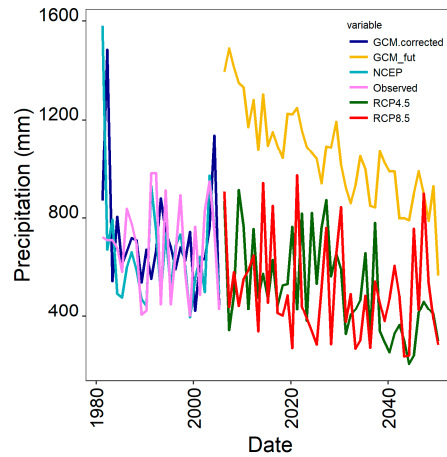

HOSHA

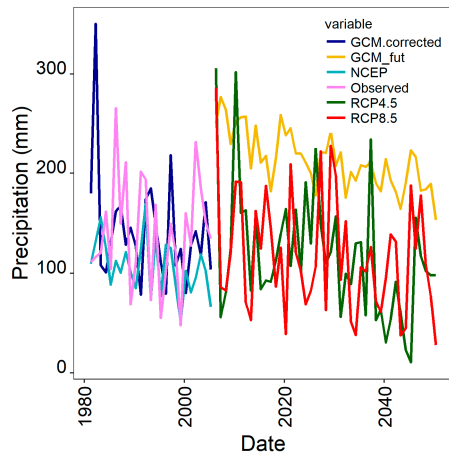

HUSN

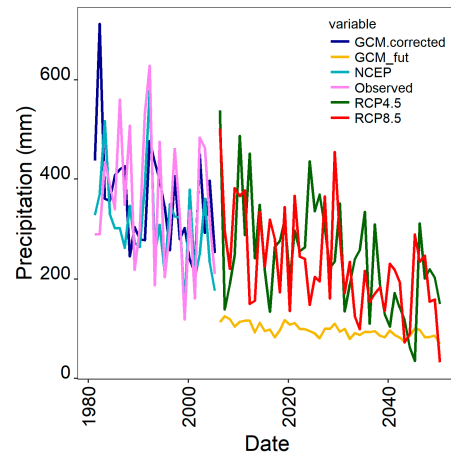

IRBID SCHOOL

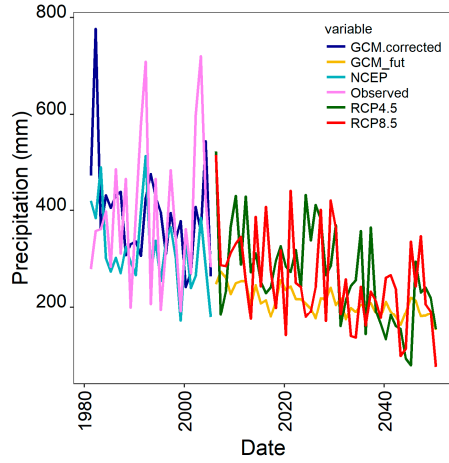

JABER MUGHAYYIR

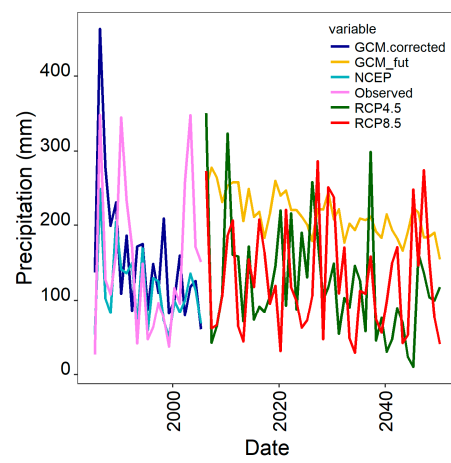

JARASH

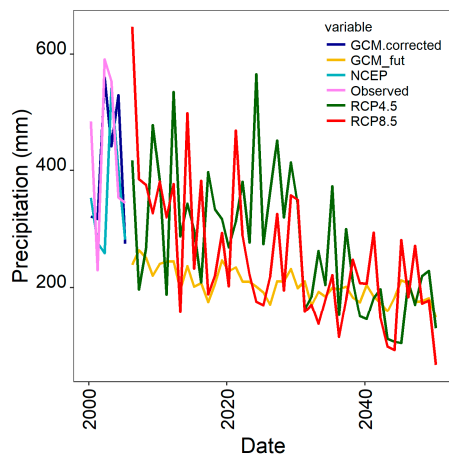

JERUSALEM CENTRAL, IS

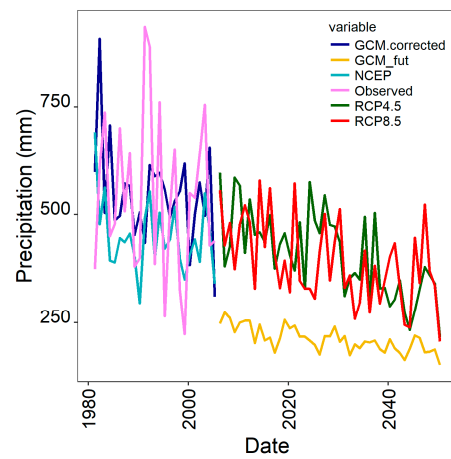

JUBEIHA

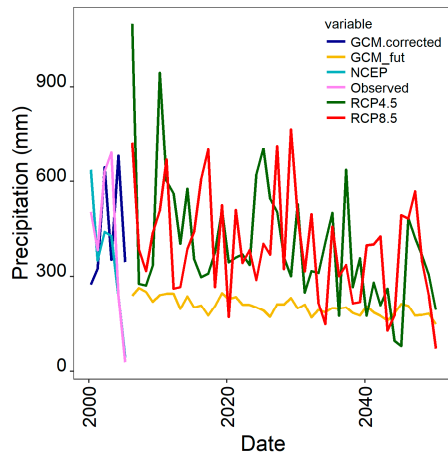

K.H.NURSERY EVAP.ST(BAQ'A)

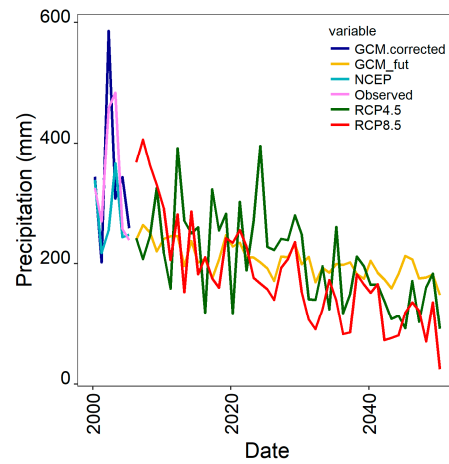

KHANASIRA

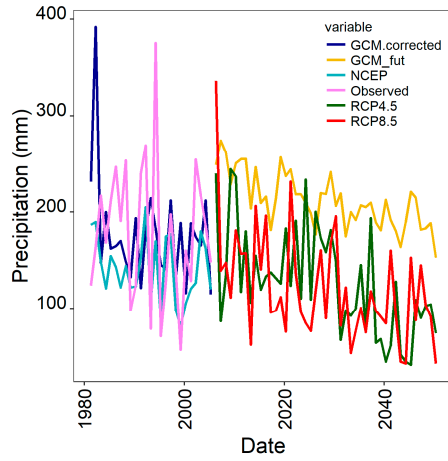

KHARJA

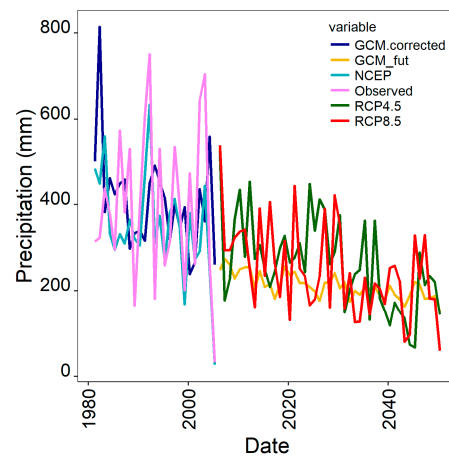

KITTA

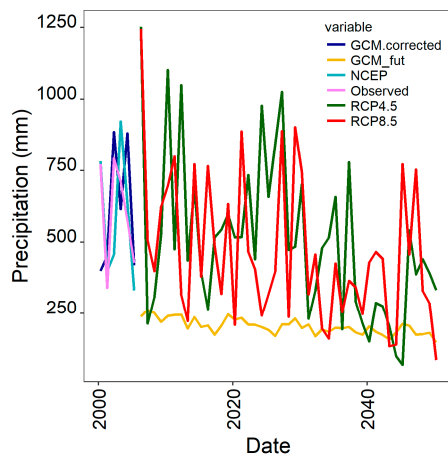

KUFR SAUM

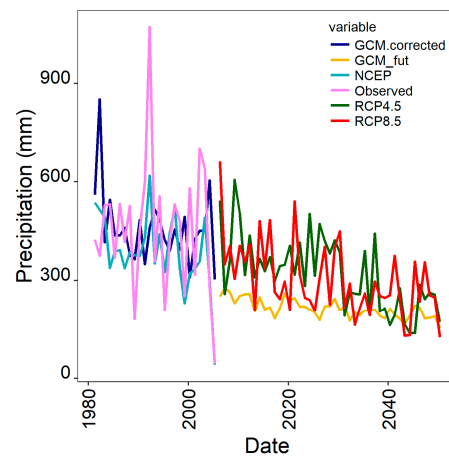

MAFRAQ AIR PORT

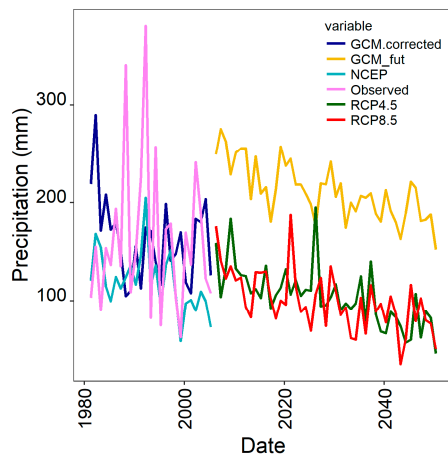

MIDWAR

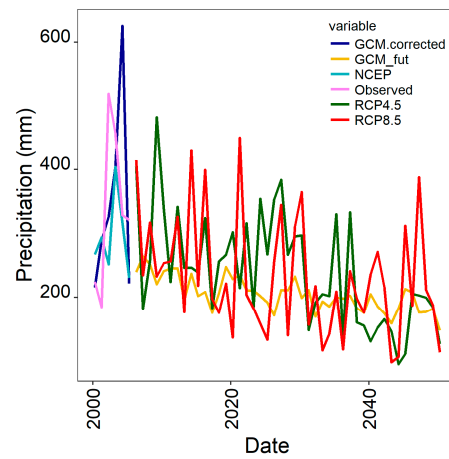

NAWASIF

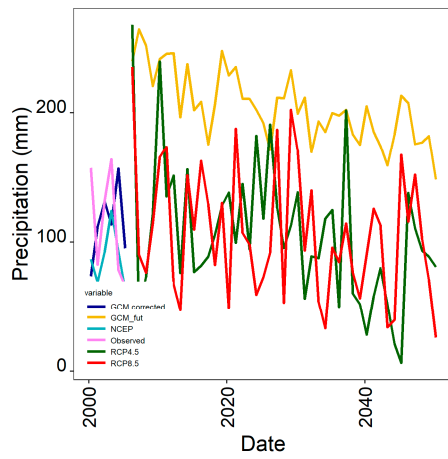

PRINCE FEISAL NURSERY

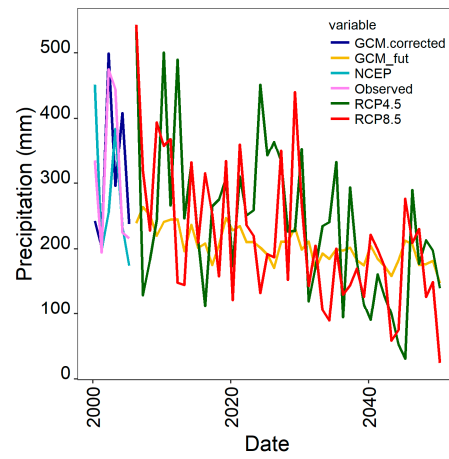

QAFQAF

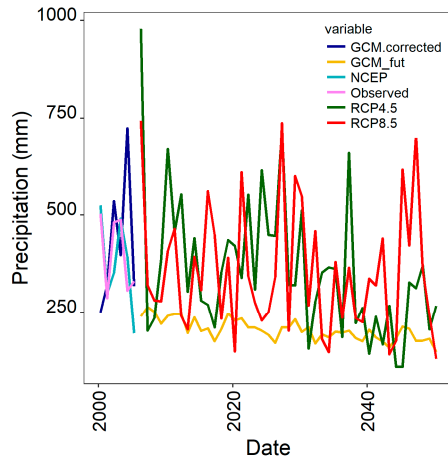

RAMTHA BOYS SCHOOL

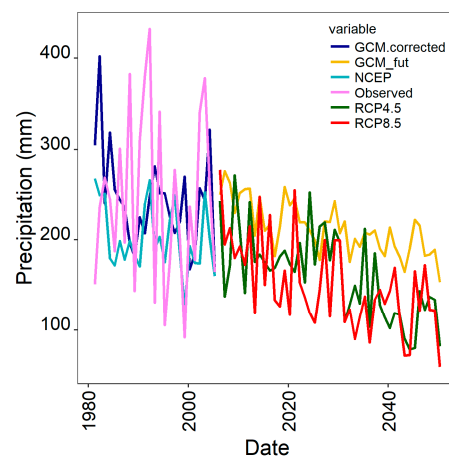

RUMEIMIN

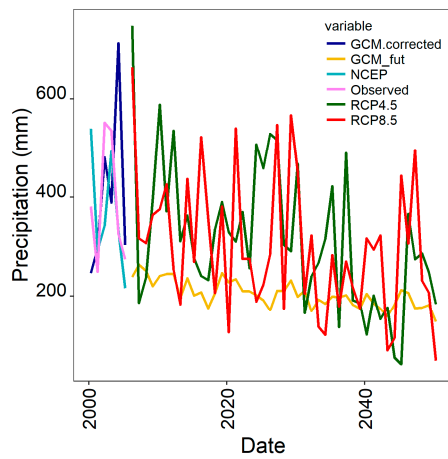

RUSEIFA

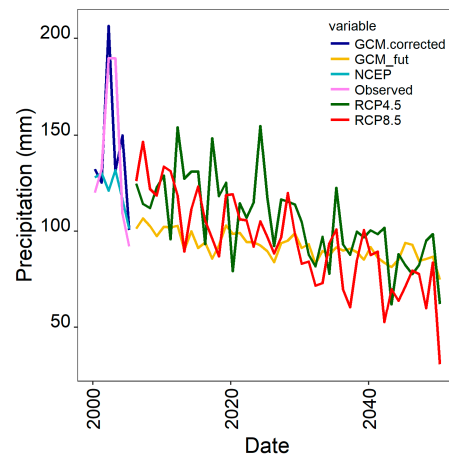

SIHAN

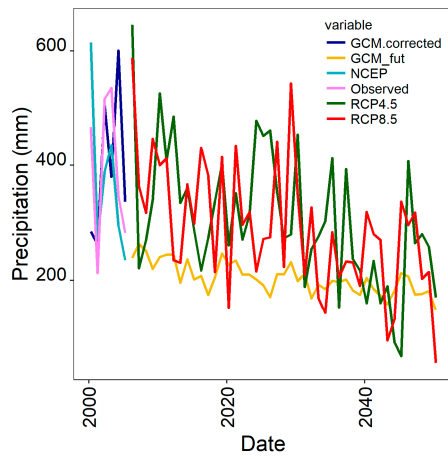

SUBEIHI

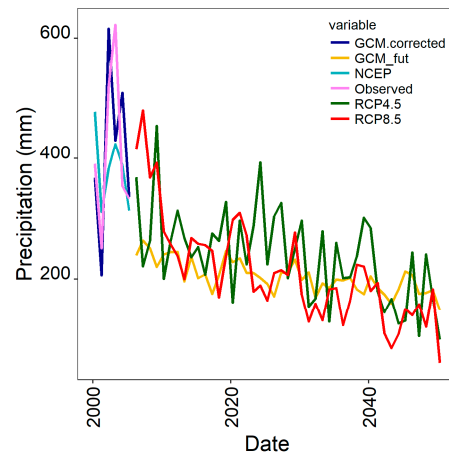

SUKHNA

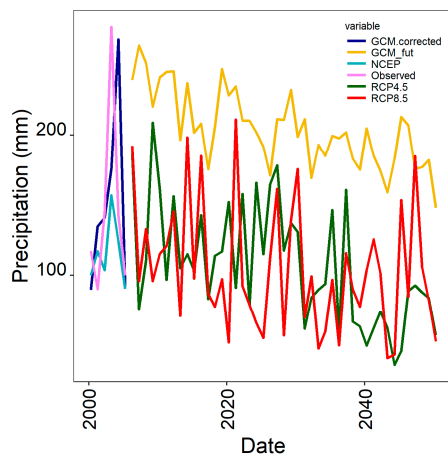

TURRA

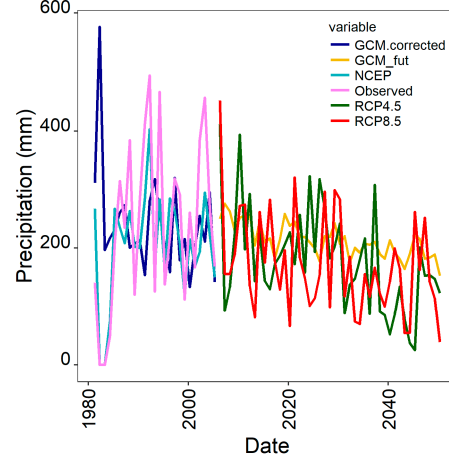

UM EL-JUMAL EVAP .ST

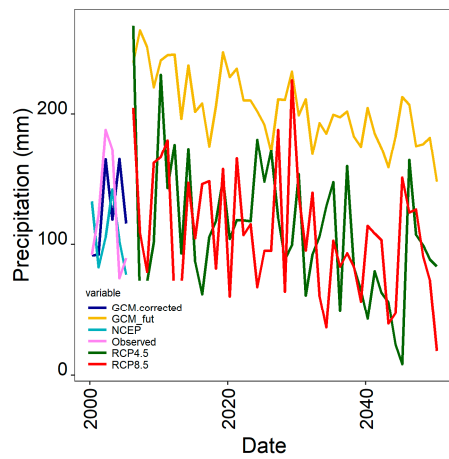

UM JAUZA

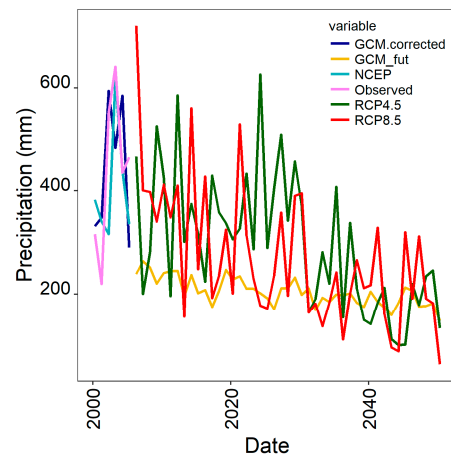

UM QEIS

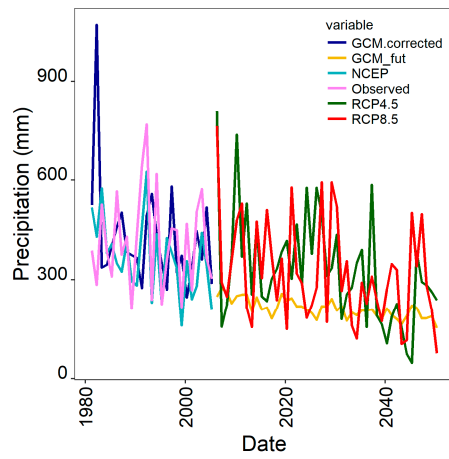

WADI DHULEIL NURSERY

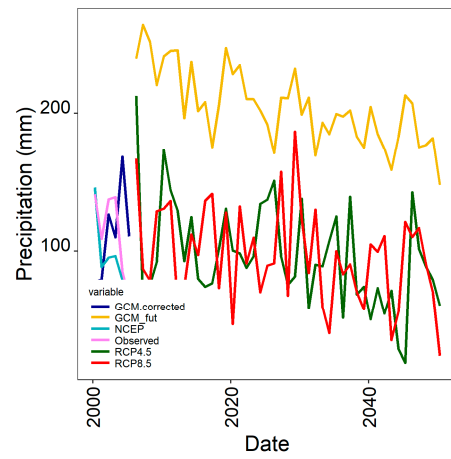

**Table S7** Temperature Parametric Test and the p-Values.

| Station        | Season    | D       | p-value   |
|----------------|-----------|---------|-----------|
| Beirut Airport | Winter    | 0.05283 | 0.09846   |
|                | Spring    | 0.09302 | 0.0557    |
|                | Summer    | 0.22266 | 3.37E-05  |
|                | Fall      | 0.10227 | 2.47E-05  |
|                | One Model | 0.0733  | 1.42E-10  |
| Damascus       | Winter    | 0.06411 | 0.02386   |
|                | Spring    | 0.06187 | 0.03105   |
|                | Summer    | 0.0877  | 0.0004154 |
|                | Fall      | 0.06663 | 0.0167    |
|                | One Model | 0.05283 | 1.08E-05  |
| H4 Airbase     | Winter    | 0.03746 | 0.4711    |
|                | Spring    | 0.07258 | 0.008228  |
|                | Summer    | 0.13062 | 2.91E-08  |
|                | Fall      | 0.08964 | 0.0005194 |
|                | One Model | 0.05053 | 5.02E-05  |
| MA AN          | Winter    | 0.09643 | 0.0001325 |
|                | Spring    | 0.05963 | 0.05087   |
|                | Summer    | 0.0932  | 0.000222  |
|                | Fall      | 0.07711 | 0.004304  |
|                | One Model | 0.04477 | 0.0004893 |
| Prince Hassan  | Winter    | 0.09245 | 0.000227  |
|                | Spring    | 0.045   | 0.2321    |
|                | Summer    | 0.10165 | 2.65E-05  |
|                | Fall      | 0.07725 | 0.00337   |
|                | One Model | 0.04632 | 0.0002045 |
| Ghor Safi      | Winter    | 0.09017 | 0.0009339 |
|                | Spring    | 0.05182 | 0.1531    |
|                | Summer    | 0.0441  | 0.2979    |
|                | Fall      | 0.06627 | 0.0317    |
|                | One Model | 0.03632 | 0.01292   |
| King Hussein   | Winter    | 0.0821  | 0.002022  |
|                | Spring    | 0.0764  | 0.005282  |
|                | Summer    | 0.07279 | 0.007855  |
|                | Fall      | 0.0774  | 0.004275  |
|                | One Model | 0.04101 | 0.001984  |
| Jerusalem      | Winter    |         |           |
|                | Spring    |         |           |
|                | Summer    |         |           |
|                | Fall      |         |           |
|                | One Model |         |           |
| Har Kenaan     | Winter    | 0.07262 | 0.006998  |
|                | Spring    | 0.05218 | 0.09943   |
|                | Summer    | 0.03844 | 0.3929    |
|                | Fall      | 0.09318 | 0.000165  |
|                | One Model | 0.07501 | 4.59E-11  |

D = Kolmogorov-Smirnov test statistic that takes the absolute largest difference between two distributions across all x values

**Table S8** Precipitation Parametric Test and the p-Values.

| Station                    | D       | p-value  |
|----------------------------|---------|----------|
| AMMAN HUSSEIN COLLEGE      | 0.47222 | 5.16E-08 |
| BAL'AMA                    | 0.64583 | 1.73E-06 |
| BAQURA MET.STATION         | 0.46528 | 2.56E-11 |
| DEIR ALLA AGR. STATION     | 0.44444 | 1.54E-06 |
| EN NUEIYIME                | 0.57639 | 4.17E-06 |
| HAR KENAAN, IS             | 0.39583 | 8.28E-10 |
| HOSHA                      | 0.45591 | 2.10E-06 |
| HUSN                       | 0.51389 | 1.32E-07 |
| IRBID SCHOOL               | 0.57639 | 6.41E-09 |
| JABER MUGHAYYIR            | 0.5     | 2.35E-07 |
| JARASH                     | 0.47718 | 7.41E-07 |
| JERUSALEM CENTRAL, IS      | 0.52083 | 8.42E-08 |
| JUBEIHA                    | 0.52083 | 2.32E-07 |
| K.H.NURSERY EVAP.ST(BAQ'A) | 0.55994 | 1.30E-08 |
| KHANASIRA                  | 0.58013 | 2.14E-09 |
| KHARJA                     | 0.40972 | 1.58E-06 |
| KITTA                      | 0.52083 | 1.91E-05 |
| KUFR SAUM                  | 0.48611 | 0.000718 |
| MAFRAQ AIR PORT            | 0.54861 | 3.24E-05 |
| MIDWAR                     | 0.52778 | 2.11E-05 |
| NAWASIF                    | 0.54167 | 6.69E-05 |
| PRINCE FEISAL NURSERY      | 0.50694 | 0.000162 |
| QAFQAFA                    | 0.54167 | 0.000106 |
| RAMTHA BOYS SCHOOL         | 0.54861 | 5.13E-05 |
| RUMEIMIN                   | 0.5625  | 0.000133 |
| RUSEIFA                    | 0.57639 | 0.000416 |
| SIHAN                      | 0.61806 | 5.39E-06 |
| SUBEIHI                    | 0.49306 | 0.000571 |
| SUKHNA                     | 0.49306 | 0.00027  |
| TURRA                      | 0.56944 | 3.05E-09 |
| UM EL-JUMAL EVAP .ST       | 0.53472 | 2.03E-07 |
| UM JAUZA                   | 0.47917 | 6.55E-07 |
| UM QEIS                    | 0.54167 | 4.35E-08 |
| WADI DHULEIL NURSERY       | 0.52778 | 5.34E-08 |

D = Kolmogorov-Smirnov test statistic that takes the absolute largest difference between two distributions across all x values

## References in Supplementary Material

94. Pomee, M.S., Hertig, E. Temperature Projections over the Indus River Basin of Pakistan Using Statistical Downscaling. *atm* **2021**, 12(2), pp. 195. [[Google Scholar](#)].
95. Araya-Osses, D., Casanueva, A., Román-Figueroa, C., Uribe, J.M., Paneque, M. Climate change projections of temperature and precipitation in Chile based on statistical downscaling. *Clim Dyn* **2020**, 54(9-10), pp. 4309–4330. [[Google Scholar](#)].
96. Phuong, D.N., Duong, T.Q., Liem, N.D., Tram, V.N., Cuong, D.K., Loi, N.K. Projections of Future Climate Change in the Vu Gia Thu Bon River Basin, Vietnam by Using Statistical Down Scaling Model (SDSM). *Water* **2020**, 12(3), pp. 755. [[Google Scholar](#)].
97. Mukhtar, M., Qasim, M. Future predictions of precipitation and temperature in Iraq using the statistical downscaling model. *Arab J Geosci* **2019**, 12(2). [[Google Scholar](#)].
98. Sachindra, D., Ahmed, K., Rashid, M., Shahid, S., Perera, B. Statistical downscaling of precipitation using machine learning techniques. *Atmos Res* **2018**, 212, pp. 240–258. [[Google Scholar](#)].
99. Tahir, T., Hashim, A.M., Yusof, K.W. Statistical downscaling of rainfall under transitional climate in Limbang River Basin by using SDSM. IOP Conference Series: *Earth Environ Sci* **2018**, 140, pp. 012037. [[Google Scholar](#)].
100. Rashid, M.M., Beecham, S., Chowdhury, R.K. Statistical downscaling of CMIP5 outputs for projecting future changes in rainfall in the Onkaparinga catchment. *Sci Total Environ* **2015**, 530-531, pp. 171-182. [[Google Scholar](#)].
101. Beecham, S., Rashid, M., Chowdhury, R.K. Statistical downscaling of multi-site daily rainfall in a South Australian catchment using a Generalized Linear Model. *Int J Climatol* **2014**, 34(14), pp. 3654-3670. [[Google Scholar](#)].
102. Goly, A., Teegavarapu, R.S.V., Mondal, A. Development and evaluation of statistical downscaling models for monthly precipitation. *El* **2014**, 18(18), pp. 1-28. [[Google Scholar](#)].
103. Mishra, P.K., Khare, D., Mondal, A., Kundu, S. Multiple linear regression based statistical downscaling of daily precipitation in a canal command. In M. Singh, R. Singh, & M. Hassan (Eds.), *Climate Change and Biodiversity Advances in Geographical and Environmental Sciences* 2014, pp. 73-83. Tokyo: Springer. [[Google Scholar](#)].
104. Pervez, M.S., Henebry, G.M. Projections of the Ganges–Brahmaputra precipitation—Downscaled from GCM predictors. *Journal of Hydrology* **2014**, 517, pp. 120-134. [[Google Scholar](#)].
105. Jeong, D., Hilaire, A. S., Ouarda, T., Gachon, P. Multisite statistical downscaling model for daily precipitation combined by multivariate multiple linear regression and stochastic weather generator. *Clim Change* **2012**, 114(3-4), pp. 567-591. [[Google Scholar](#)].
106. Meenu, R., Rehana, S., Mujumdar, P.P. Assessment of hydrologic impacts of climate change in Tunga–Bhadra river basin, India with HEC-HMS and SDSM. *Hydrol Process* **2012**, 27(11), pp. 1572-1589. [[Google Scholar](#)].
107. Brands, S., Taboada, J.J., Cofiño, A.S., Sauter, T., Schneider, C. Statistical downscaling of daily temperatures in the NW Iberian Peninsula from global climate models: Validation and future scenarios. *Clim Res* **2011**, 48(2), pp. 163-176. [[Google Scholar](#)].
108. Fistikoglu, O., Okkan, U. Statistical downscaling of monthly precipitation using NCEP/NCAR reanalysis data for Tahtali river basin in Turkey. *J Hydrol* **2011**, 16(2), pp. 157-164. [[Google Scholar](#)].
109. Raje, D., Mujumdar, P.P. A comparison of three methods for downscaling daily precipitation in the Punjab region. *Hydrol Process* **2011**, 25(23), pp. 3575-3589. [[Google Scholar](#)].
110. Chen, S.T., Yu, P.S., Tang, Y.H. Statistical downscaling of daily precipitation using support vector machines and multivariate analysis. *J Hydrol* **2010**, 385(1-4), pp. 13-22. [[Google Scholar](#)].
111. Hessami, M., Gachon, P., Ouarda, T.B.J., St-Hilaire, A. Automated regression-based statistical downscaling tool. *Environ Model Softw* **2008**, 23(6), pp. 813-834. [[Google Scholar](#)].
112. Pharasi, S. Development of statistical downscaling methods for the daily precipitation process at a local site. Master of Engineering, Department of Civil Engineering and Applied Mechanics, McGill University, Canada. 2006. [[Google Scholar](#)].
113. Harpham, C., Wilby, R.L. Multi-site downscaling of heavy daily precipitation occurrence and amounts. *J Hydrol* **2005**, 312(1-4), 235-255. [[Google Scholar](#)].
